# Supplementary material for: Data‐driven analysis of JAK2V617F kinetics during interferon‐alpha2 treatment of patients with polycythemia vera and related neoplasms
Source: PubMed Central journal article supplement (PMC7064092; doi:10.1002/cam4.2741), 2020-01-28
Supplement: CAM4-9-2039-s001.pdf [file CAM4-9-2039-s001.pdf]

# Supplementary material

“Data-driven Analysis of *JAK2*V617F Kinetics During Interferon-Alpha2 Treatment of Patients with Polycythemia Vera and Related Neoplasms”

## A Values of fit-parameters

In this section we present the specific values of the parameters for the 64 fits to the patient-responses. The fits are shown visually in the supplementary D.

For reference, the functional forms of the two models will be shown here.

The mono-exponential decay has form:

$$f_m(t) = A \cdot e^{-\alpha t} \quad (1)$$

The bi-exponential model is defined somewhat differently than described in the main paper. This is done in the fitting procedure to ensure that some parameters are positive and that the slope at  $t = 0$  was continuous. As such the functional form is:

$$f_b(t) = B \cdot \left( \frac{\beta^2 + c^2 + \nu}{c^2} \cdot e^{-\beta^2 t} - \frac{\beta^2 + \nu}{c^2} \cdot e^{-(\beta^2 + c^2)t} \right) \quad (2)$$

Where  $\nu$  is the growth-rate before treatment is initiated.

To determine how well a given model fits a dataset a multitude of goodness-of-fit (GoF) measures can be used. We use the adjusted R-square,  $\bar{R}^2$  values as given by:

$$\bar{R}^2 = 1 - \frac{SSE(n-1)}{SST(n-m)} \quad (3)$$

Where  $SSE$  is the sum of squared errors,  $SST$  is the total sum of square,  $n$  is the number of data-points and  $m$  is the number of coefficients fitted.

This measure is automatically calculated as part of the MATLAB `fit` procedure.

In Supplemental table 1 the parameters found are shown, along with the corresponding adjusted  $R^2$  goodness-of-fit values.

## B Distribution of fit-parameters

In this section we will present the distributions of the fit-coefficients presented in supplementary A.

Firstly, this section serves to illustrate the distributions of patient-responses. Secondly, to describe how the parameters for a population-level mono-exponential response and for a population-level bi-exponential response were determined. Before presenting the arguments for the choices of parameter-values, the specific values found is shown in Supplemental table 2.

As such, the mono-exponential response from equation (1), can be expressed numerically as:

$$f_m(t) = A \cdot e^{-0.46t} \quad (4)$$

With the growth-rate before treatment estimated as  $0.49 \text{ year}^{-1}$  (yielding a period of doubling of 1.41 years), the bi-exponential response from equation (2) can be stated as a numerical expression:

$$f_b(t) = B \cdot (1.32e^{-0.74t} - 0.32e^{-4.61t}) \quad (5)$$

By visual inspection of the fits shown in the supplementary D, a conservative threshold for the minimal  $\bar{R}^2$  accepted as a good fit is chosen as  $\bar{R}^2 \geq 0.6$ .

### Mono-exponential

A total of 28 fits are above the threshold for the mono-exponential fit. In figure 1 a histogram of the  $\alpha$  parameter-values of all fits of the mono-exponential model with  $\bar{R}^2$  above the threshold is shown. Additionally, the Gaussian distribution best fitting these values is shown in black, as well as the result of a Gaussian mixture modelling of the data with two Gaussian distributions, shown in dashed blue. The Gaussian mixture modelling was fitted using the `fitgmdist` MATLAB function included in the *Statistics and Machine Learning Toolbox*. The function also evaluates the Akaike Information Criterion (AIC) which is used to determine whether one or two Gaussians was the best description of the distribution.

The single Gaussian has a mean of 0.62 and a standard deviation of 0.39, while the two Gaussians has means 0.46 and 1.35, standard deviations 0.19 and 0.23, with mixture coefficients of 0.82 and 0.18 respectively.

From the AIC the sum of the two Gaussian distributions is determined to be the better descriptor of the distribution of the values.

The two Gaussian distributions split the  $\alpha$ -parameters in two groups. Since the Gaussian with the lower mean is representative for the majority of the  $\alpha$  parameter-values, the population-level mono-exponential decay expression is determined to have an  $\alpha$  of 0.46. With a standard deviation of 0.19, this yields 95 % confidence intervals between 0.08 and 0.84. Note that the group with the higher mean consists of patients that responded very well to treatment, and as such, picking the lower groups as the population response allows for a conservative estimate of the efficacy of treatment.

Since the  $A$  parameter of the mono-exponential form is simply the *JAK2V617F* allele burden at the initial time, determining a representative value for the parameter is unnecessary for present purposes.

As the threshold of  $\bar{R}^2$  greater than 0.6 might be considered to strict, we also include the histogram and distribution given a threshold of 0.3. The less strict threshold leads to 38 acceptable fits. While these values are worse fits to the given patient-responses, the distribution is found to be similar, and thus the previously found values should also be a representative value for the additional patients. Figure 2 shows the distributions of  $\alpha$  for the lower threshold.

## Bi-exponential

A total of 32 fits are above the threshold for the mono-exponential fit. Figure 3 shows two histograms of the  $\beta^2$  parameter values of all fits of the bi-exponential model with  $\bar{R}^2$  above 0.6. One histogram (bottom) shows the  $\beta^2$  distribution, while the other (top) displays the distribution of  $\log(\beta^2)$ . Additionally, the Gaussian distribution best fitting the  $\log(\beta^2)$  distribution is shown in black, as well as the result of a Gaussian mixture modelling of the data with two Gaussian distributions, shown in dashed blue. This fitting of the Gaussian mixture model was done to the logarithmic values, as the distribution is assumed to be log-normally distributed.

From the distribution on a logarithmic scale, the single Gaussian has a mean of  $-0.39$ , with standard deviation of 0.74. The mixed Gaussians has means  $-0.63$  and  $0.54$  with standard deviations 0.62 and 0.31 and mixture coefficients of 0.79 and 0.21 respectively.

In the case of the bi-exponential model, using the AIC, the single Gaussian distribution is determined to be the better descriptor. As such we have  $\log(\beta^2) = -0.39$  or  $\beta^2 = 0.68$  as our population-level value for  $\beta^2$ . Since the standard deviation is 0.74, the corresponding 95 % confidence intervals are 0.15 and 2.97.

As in the mono-exponential case, we also present a figure of the distributions found given a less strict threshold, namely a threshold of  $\bar{R}^2 \geq 0.3$ . The less strict threshold leads to 37 acceptable fits. This is found in figure 4. The values for the  $c^2$  parameters are found to vary across many orders of magnitude. This is to be expected as there is almost no difference between low values of  $c^2$  once a certain low threshold has been reached, and similarly for high values of  $c^2$ . As such we decide to use the median value of fits with  $\bar{R}^2 > 0.6$  for the population value of the  $c^2$  parameter, yielding a value of 3.87.

As in the mono-exponential case, the parameter  $B$  is determined by the *JAK2V617F* allele burden at the initial time.

## C Risk of secondary cancers

In this section we will derive a mathematical expression relating the time at which treatment is initiated with the mutational load, or the risk of secondary cancers.

For patients experiencing exponential growth of some disease indicator (such as *JAK2V617F* allele burden), and with treatment resulting in exponential decay of the disease indicator, the disease indicator can be described as:

$$f(t) = \begin{cases} Ae^{\alpha t} & \text{for } t \leq \tau \\ Ae^{\alpha \tau} e^{-\beta(t-\tau)} & \text{for } t > \tau \end{cases} \quad (6)$$

where  $A$  is some arbitrarily low detection limit,  $\alpha$  is the exponential growth rate before treatment,  $\beta$  is the exponential decay rate during treatment and  $\tau$  is the time at which treatment starts. We will use units of days, such that  $\tau$  is in days, while  $\alpha$  and  $\beta$  is in days $^{-1}$ , but any matching units (e.g. years and years $^{-1}$ ) could also be used.

Considering some initial day,  $t = 0$ , where a lower limit  $A$  of the indicator can be measured, i.e.  $f(0) = A$ , and some final day  $t_f > \tau$  at which the same detection limit is reached again, i.e.  $f(t_f) = A$ , the mathematical problem now has boundary conditions.

Note that  $f(t_f) = Ae^{(\alpha+\beta)\tau} e^{-\beta t_f}$  since  $t_f > \tau$ . Since we have defined  $t_f$  such that  $f(0) = f(t_f)$ , this implies that  $t_f = \frac{\alpha+\beta}{\beta}\tau$ .

The number of days of treatment need to reach  $A$  is given as  $t_f - \tau = \tau \left( \frac{\alpha + \beta}{\beta} - 1 \right) = \frac{\alpha}{\beta} \tau$ . Thus it is clear that for  $\alpha > 0$  and  $\beta > 0$ , the days of treatment needed to reach  $A$  increases with  $\tau$ .

Denoting the integral of  $f(t)$  from  $t = 0$  to  $t = t_f$  as  $F(t)$  we find:

$$F(t) = \int_0^{t_f} f(t) dt = A \int_0^{\tau} e^{\alpha t} dt + Ae^{(\alpha + \beta)\tau} \int_{\tau}^{t_f} e^{-\beta t} dt \quad (7)$$

$$= A \frac{e^{\alpha \tau} - 1}{\alpha} - \frac{A}{\alpha} - \frac{A}{\beta} + A \frac{e^{-\beta t_f}}{\beta} \quad (8)$$

$$= A (e^{\alpha \tau} - 1) \left( \frac{1}{\alpha} + \frac{1}{\beta} \right). \quad (9)$$

For  $\alpha \tau \ll 1$  we have  $e^{\alpha \tau} - 1 \approx \alpha \tau$ , and the expression is linear in  $\tau$ . For  $\alpha \tau \gg 1$ , the expression is approximately  $Ae^{\alpha \tau} \left( \frac{1}{\alpha} + \frac{1}{\beta} \right)$ . As such the rate of doubling for large  $\alpha \tau$  is  $\frac{\log(2)}{\alpha}$ .

If the disease indicator  $f(t)$  is proportional to the number of mutated cells, there is a proportionality constant,  $M$ , relating  $f(t)$  to the number of mutated cells at any given time. The integral of  $Mf(t)$  for all time yields the accumulated number of mutated cells per day. Since  $\int Mf(t) dt = MF(t)$ , the average number of mutated cells per day is found to also double with rate  $\frac{\log(2)}{\alpha}$ . Assuming cells having a constant probability of dividing at any given time, the average number of division of mutated cells is given as  $MrF(t)$  where  $r$  is the rate of division. Denoting this as

$$D(\tau) = MrA (e^{\alpha \tau} - 1) \left( \frac{1}{\alpha} + \frac{1}{\beta} \right). \quad (10)$$

If every division of mutated cells has a given probability of resulting in a second mutation,  $D(\tau)$  is a measure of this probability. The doubling rate of  $D(\tau)$  is also approximately  $\frac{\log(2)}{\alpha}$  for  $\alpha \tau \gg 1$  as was the case for  $f(\tau)$ . Given  $\alpha \approx 0.0013$  and assuming  $\tau \gg \frac{1}{\alpha} \approx 770$  days, we see that the risk of second mutations double approximately every 1.4 years treatment is postponed.

## D Figures of fits

Data for all patients are shown in Supplemental figures 6 through 71 together with the two fit-types as well as an extrapolated growth following the exponential growth determined in the main paper. All figures are shown twice, with a linear y-axis of the left hand side and with a logarithmic y-axis on the right hand side.

Data is shown as black stars, the bi-exponential fit as a full red line, the mono-exponential fit as a dashed blue line and finally the extrapolated growth is shown in dotted black.

## E Randomisation, criteria and IFN dosage

### E.1 Randomisation, DALIAH

Patients  $> 60$  years of age:

I:I randomization to either Hydroxyurea, r-IFN $\alpha$ -2a, or r-IFN $\alpha$ -2b at starting dose according to dose-level 0.

Patients  $\leq 60$  years of age:

I:I randomization to either r-IFN $\alpha$ -2a, or r-IFN $\alpha$ -2b at starting dose according to dose-level 0.

### E.2 Inclusion and exclusion criteria

#### Inclusion criteria

- Age  $> 18$  years of age at the time of signing the informed consent.
- ET, PV, Pre-MF or hyperproliferative PMF (WBC  $> 10 \cdot 10^9/l$  or platelets  $> 400 \cdot 10^9/l$ ) according to the WHO criteria.
- No previous cytoreductive treatment with HU or IFN. However, HU was allowed from time of diagnosis to randomization. Previous phlebotomized PV patients were eligible.
- Active disease defined as WBC  $> 10 \cdot 10^9/l$  or platelets  $> 400 \cdot 10^9/l$  in the absence of infection or inflammation, need of phlebotomy, constitutional symptoms i.e. weight loss  $> 10\%$  within 6 months, night sweats, subfebrilia (temp.  $> 38^\circ\text{C}$  for more than 2 weeks without signs of infection), pruritus, symptomatic splenomegaly, or previous thrombosis.

- Ability to comply to study visits and requirements.

### **Exclusion criteria**

- Pregnant or lactating females
- Females of childbearing potential (FCBP) had to undergo pregnancy testing and the result had to be negative
- Inadequate or lack of acceptance to use adequate contraceptive method by FCBPs (oral contraceptives, intra uterine device, implant, transdermal patch, vaginal ring, depot injection). Infertile patients were exempted from using contraceptive methods. To be considered infertile the patients had to be surgically sterilized (vasectomy, bilateral tubectomy, hysterectomy, or ovariectomy) or post menopausal defined as amenorrhea < 12 months at time of inclusion)
- History of another malignancy within five years of enrolment (except basal cell carcinoma of the skin)
- Eastern Cooperative Group Oncology Status  $\geq 3$
- Serum creatinine  $> 2 \times$  the upper limit of the normal range (ULN)
- Total bilirubin  $1.5 > \text{ULN}$
- Plasma ALAT  $3 > \text{ULN}$
- History of psychiatric disorder (depression diagnosed by psychiatrist)
- Autoimmune disorder
- Uncontrolled hyperthyroidism or hypothyroidism
- Severe cardiac disease (New York Heart Association Functional Class III or VI)
- Severe myelosuppression
- Chronic hepatitis infection with decompensated liver cirrhosis or recent (within 6 months) immunosuppressive therapy except corticosteroids
- Epilepsy or other severe CNS disorders
- Hypersensitivity to recombinant interferon or hydroxyurea or excipients to these drugs

### **E.3 IFN dose-escalation**

See Supplemental figure 5

### **E.4 IFN dose levels**

See Supplemental table 3

### **E.5 IFN interruption or discontinuation due to adverse events**

Adverse events were graded according to the Common Terminology Criteria for Adverse Events (CTCAE) version 4.0. Before IFN administration it was ensured that the platelet count  $> 100 \cdot 10^9/l$ , neutrophilic count  $> 1 \cdot 10^9/l$  and that haemoglobin level  $> 6.2\text{mmol/l}$ . A maximum treatment interruption period of 6 months was allowed. Reasons for exclusion from the study included:

- Adverse events
- Other disease
- Non-compliance
- Exclusion criteria fulfilled
- Abnormal biochemistry
- Administrative problems
- Treatment interruption  $> 6$  months

- Death
- Other reason

See Supplemental table 4 for details.

## Supplemental tables and figures

|            | Best fit | Mono, $\alpha$ | Mono, $A$ | Mono, $R^2$ | Bi, $\beta$ | Bi, $c$  | Bi, $B$ | Bi, $R^2$ |
|------------|----------|----------------|-----------|-------------|-------------|----------|---------|-----------|
| Patient 1  | Bi       | 1.058          | 54.784    | 0.935       | 1.520       | -0.020   | 49.414  | 0.989     |
| Patient 2  | Mono     | 1.274          | 54.571    | 0.968       | 1.161       | 5.099    | 53.998  | 0.964     |
| Patient 3  | Mono     | 0.282          | 27.568    | 0.774       | 0.531       | 1603.103 | 27.569  | 0.729     |
| Patient 4  | Mono     | 0.743          | 10.257    | 0.453       | 0.864       | 1331.683 | 10.270  | 0.344     |
| Patient 5  | Mono     | 1.306          | 10.577    | 0.722       | -1.143      | 1589.876 | 10.578  | 0.629     |
| Patient 6  | Mono     | 0.101          | 24.404    | 0.406       | -0.318      | 2599.590 | 24.404  | 0.258     |
| Patient 7  | Mono     | 0.060          | 57.595    | -0.302      | 0.244       | 1473.537 | 57.595  | -1.604    |
| Patient 8  | Mono     | 0.497          | 37.614    | 0.977       | 0.705       | 3064.888 | 37.614  | 0.973     |
| Patient 9  | Mono     | 0.623          | 49.608    | 0.976       | 0.790       | 2929.200 | 49.608  | 0.972     |
| Patient 10 | Bi       | 0.670          | 21.859    | 0.937       | 0.923       | 2.004    | 20.338  | 0.958     |
| Patient 11 | Mono     | 0.036          | 31.287    | -0.092      | -0.191      | 1891.624 | 31.287  | -0.310    |
| Patient 12 | Bi       | 0.109          | 45.810    | 0.359       | 0.725       | 0.001    | 38.369  | 0.685     |
| Patient 13 | Mono     | 0.724          | 45.122    | 0.966       | 0.881       | 3.816    | 43.946  | 0.962     |
| Patient 14 | Mono     | 0.619          | 65.174    | 0.967       | 0.808       | 4.524    | 64.024  | 0.962     |
| Patient 15 | Mono     | 0.203          | 0.492     | -0.279      | 0.912       | 0.040    | 0.432   | -0.901    |
| Patient 16 | Mono     | 0.135          | 24.569    | 0.346       | -0.368      | 2652.808 | 24.569  | 0.237     |
| Patient 17 | Mono     | 0.439          | 19.544    | 0.962       | -0.663      | 1356.620 | 19.544  | 0.943     |
| Patient 18 | Bi       | 0.026          | 2.561     | -0.130      | -0.611      | 0.012    | 2.145   | 0.057     |
| Patient 19 | Mono     | 0.379          | 91.802    | 0.965       | 0.616       | 2783.436 | 91.802  | 0.960     |
| Patient 20 | Mono     | 0.036          | 28.677    | -0.241      | 0.189       | 2622.892 | 28.679  | -0.655    |
| Patient 21 | Bi       | 0.754          | 84.352    | 0.870       | 1.296       | -0.059   | 72.808  | 0.958     |
| Patient 22 | Bi       | -0.192         | 6.911     | 0.479       | 0.393       | 0.001    | 6.236   | 0.528     |
| Patient 23 | Bi       | 1.402          | 85.293    | 0.869       | 1.728       | -0.018   | 77.430  | 0.947     |
| Patient 24 | Bi       | 0.183          | 18.070    | 0.099       | 0.912       | 0.084    | 15.842  | 0.221     |
| Patient 25 | Mono     | -0.001         | 56.522    | -0.167      | 0.016       | 7.469    | 29.714  | -3.670    |
| Patient 26 | Mono     | -0.228         | 39.814    | 0.993       | -0.000      | 1.150    | 38.668  | 0.740     |
| Patient 27 | Bi       | -0.009         | 26.094    | -0.122      | -0.137      | 1.448    | 23.144  | 0.061     |
| Patient 28 | Mono     | 0.028          | 13.602    | -0.073      | 0.167       | 1433.696 | 13.602  | -0.252    |
| Patient 29 | Bi       | -0.000         | 56.102    | -0.167      | -0.377      | 0.798    | 47.523  | 0.802     |
| Patient 30 | Bi       | 0.545          | 27.707    | 0.803       | 1.129       | 0.012    | 23.865  | 0.951     |
| Patient 31 | Bi       | 0.252          | 11.978    | 0.343       | 0.866       | -0.062   | 9.971   | 0.544     |
| Patient 32 | Bi       | -0.181         | 24.447    | 0.451       | 0.506       | -0.027   | 22.628  | 0.640     |
| Patient 33 | Bi       | 0.288          | 46.089    | 0.757       | 0.925       | 0.001    | 38.567  | 0.846     |
| Patient 34 | Mono     | 0.485          | 6.502     | 0.270       | 1.324       | -0.038   | 6.222   | 0.180     |
| Patient 35 | Bi       | 0.461          | 91.655    | 0.627       | 1.282       | -0.000   | 85.871  | 0.736     |
| Patient 36 | Bi       | 0.509          | 21.030    | 0.940       | 0.812       | 1.720    | 19.018  | 0.949     |
| Patient 37 | Mono     | 0.305          | 13.391    | -0.270      | 0.552       | 1300.860 | 13.391  | -1.540    |
| Patient 38 | Bi       | 0.275          | 94.828    | 0.839       | 0.683       | 1.204    | 83.198  | 0.897     |
| Patient 39 | Mono     | -0.347         | 21.328    | 0.233       | -0.015      | 1.181    | 22.905  | -1.290    |
| Patient 40 | Bi       | 0.320          | 67.526    | 0.655       | 1.037       | -0.000   | 61.195  | 0.929     |
| Patient 41 | Bi       | 0.118          | 55.335    | 0.132       | 0.678       | 1.098    | 51.638  | 0.646     |
| Patient 42 | Mono     | 0.556          | 18.684    | 0.685       | 0.746       | 1330.142 | 18.687  | 0.622     |
| Patient 43 | Mono     | 0.330          | 62.178    | 0.939       | 0.574       | 2577.088 | 62.178  | 0.927     |
| Patient 44 | Mono     | 0.484          | 10.624    | 0.580       | 0.696       | 1209.771 | 10.625  | 0.495     |
| Patient 45 | Mono     | -0.023         | 91.113    | 0.379       | 0.001       | 21.156   | 93.622  | -0.507    |
| Patient 46 | Mono     | -0.132         | 3.378     | 0.028       | -0.001      | 4.843    | 3.767   | -0.685    |
| Patient 47 | Mono     | 0.457          | 20.498    | 0.344       | -0.677      | 1455.069 | 20.503  | 0.181     |
| Patient 48 | Mono     | 0.032          | 18.545    | -0.169      | 0.180       | 2004.221 | 18.545  | -0.462    |
| Patient 49 | Bi       | 0.262          | 105.049   | 0.769       | 0.908       | -0.026   | 88.827  | 0.933     |
| Patient 50 | Bi       | 0.148          | 65.971    | 0.640       | 0.506       | 1.967    | 62.528  | 0.913     |
| Patient 51 | Mono     | 0.184          | 84.548    | 0.798       | 0.429       | 2490.317 | 84.548  | 0.764     |
| Patient 52 | Mono     | 0.262          | 36.321    | 0.302       | -0.512      | 2619.741 | 36.325  | 0.163     |
| Patient 53 | Mono     | 0.301          | 20.813    | 0.688       | 0.570       | 3.125    | 20.007  | 0.653     |
| Patient 54 | Mono     | 0.125          | 36.188    | 0.380       | -0.353      | 2653.729 | 36.189  | 0.255     |
| Patient 55 | Mono     | 0.445          | 43.563    | 0.577       | -0.667      | 1564.166 | 43.567  | 0.436     |

|            |      |        |        |        |        |          |        |        |
|------------|------|--------|--------|--------|--------|----------|--------|--------|
| Patient 56 | Mono | 0.219  | 27.316 | -0.142 | 0.468  | 2595.645 | 27.316 | -0.713 |
| Patient 57 | Bi   | 1.729  | 41.436 | 0.992  | 1.379  | 4.718    | 41.006 | 0.992  |
| Patient 58 | Mono | 0.786  | 78.216 | 0.910  | 0.908  | 4.687    | 76.992 | 0.882  |
| Patient 59 | Mono | 0.042  | 13.932 | -0.236 | -0.540 | -0.883   | 12.792 | -0.311 |
| Patient 60 | Mono | 0.041  | 47.478 | -0.194 | 0.202  | 1645.729 | 47.478 | -0.791 |
| Patient 61 | Mono | 0.125  | 50.756 | -0.069 | 0.353  | 2649.928 | 50.756 | -1.138 |
| Patient 62 | Mono | -0.268 | 12.669 | 0.470  | -0.184 | 0.001    | 11.721 | 0.447  |
| Patient 63 | Bi   | 0.677  | 51.990 | 0.888  | 1.255  | 0.018    | 45.273 | 0.988  |
| Patient 64 | Mono | -0.105 | 54.436 | 0.670  | 0.014  | 1.185    | 51.497 | 0.394  |
| Patient 65 | Mono | -0.177 | 29.655 | -0.214 | 0.000  | 1.623    | 29.320 | -1.281 |
| Patient 66 | Mono | -0.019 | 0.110  | -0.249 | 0.830  | -0.014   | 0.111  | -0.426 |

Supplemental table 1: All parameter-values as well as the goodness-of-fits for the 64 fits.

|                  |                       |       |     |
|------------------|-----------------------|-------|-----|
|                  | $\alpha$              | $A$   |     |
| Mono-exponential | 0.46 (CI: 0.08, 0.84) | N/A   |     |
|                  | $\beta^2$             | $c^2$ | $B$ |
| Bi-exponential   | 0.74 (CI: 0.15, 2.97) | 3.87  | N/A |

Supplemental table 2: Values found for the parameters of the two models.

| Dose level | r-IFN $\alpha$ -2a  | r-IFN $\alpha$ -2b  |
|------------|---------------------|---------------------|
| -3         | 35 $\mu g$ /3 weeks | 45 $\mu g$ /3 weeks |
| -2         | 35 $\mu g$ /2 weeks | 45 $\mu g$ /2 weeks |
| -1         | 35 $\mu g$ /10 days | 45 $\mu g$ /10 days |
| 0          | 35 $\mu g$ /week    | 45 $\mu g$ /week    |
| +1         | 50 $\mu g$ /week    | 90 $\mu g$ /week    |
| +2         | 96 $\mu g$ /week    | 135 $\mu g$ /week   |

Supplemental table 3: IFN Dose levels

| <b>Category</b>                          | <b>Adverse event</b>                           | <b>IFN</b>                                                                                                                                                                                                                                                                                        |
|------------------------------------------|------------------------------------------------|---------------------------------------------------------------------------------------------------------------------------------------------------------------------------------------------------------------------------------------------------------------------------------------------------|
| Non-haematological toxicity (CTCAE v. 4) | Grade 1 and 2                                  | Unchanged dose if possible plus symptomatic treatment of side effects                                                                                                                                                                                                                             |
|                                          | Grade 3                                        | Interrupt. Restart at a dose level lower when decrease to grade 1 toxicity or lower                                                                                                                                                                                                               |
|                                          | Grade 4                                        | Discontinue                                                                                                                                                                                                                                                                                       |
| Investigations (CTCAE v. 4)              | ALAT > 3.0 × ULN (grade 2)                     | Interrupt IFN. Restart once ALAT ≤ 3.0 × ULN (grade 1) at a dose level lower.                                                                                                                                                                                                                     |
|                                          | Creatinine > 1.5 × baseline ULN (grade 2)      |                                                                                                                                                                                                                                                                                                   |
| Endocrine disorders (CTCAE v. 4)         | Hyperthyroidism during rIFN $\alpha$ treatment | Discontinue.                                                                                                                                                                                                                                                                                      |
|                                          | Hypothyroidism during rIFN $\alpha$ treatment  | Continue. Start thyroid hormone replacement                                                                                                                                                                                                                                                       |
| Depression (ICD-10 criteria)             | Mild depression                                | First 4-8 weeks after onset of symptoms: Continue. Evaluation every 2 weeks.<br>- If recovery: Resume regular visit schedule<br>- If unchanged: Continue evaluation every 2 weeks<br>- If aggravation: See “moderate and severe depression”                                                       |
|                                          | Moderate depression                            | First 4-8 weeks after onset of symptoms: Decrease rIFN $\alpha$ to a dose level -1 or -2. Evaluation once weekly;<br>- if recovery: Continue with dose level -1 or -2<br>- if unchanged: Decrease dose level and consider evaluation by psychiatrist<br>- if aggravation: See “severe depression” |
|                                          | Severe depression                              | Discontinue. Evaluation by psychiatrist                                                                                                                                                                                                                                                           |

Supplemental table 4: IFN interruption or discontinuation due to adverse events



| Patient | Period of doubling (years) |
|---------|----------------------------|
| A       | 1.5 (CI: 1.1, 2.2)         |
| B       | 1.4 (CI: 1.2, 1.7)         |
| C       | 2.5 (CI: 1.5, 6.0)         |
| Pooled  | 1.4 (CI: 1.2, 1.7)         |

Supplemental table 5: Periods of *JAK2V617F* doubling for three patients (A, B and C) with confidence intervals (CI), as well as the period of doubling for the pooled data.

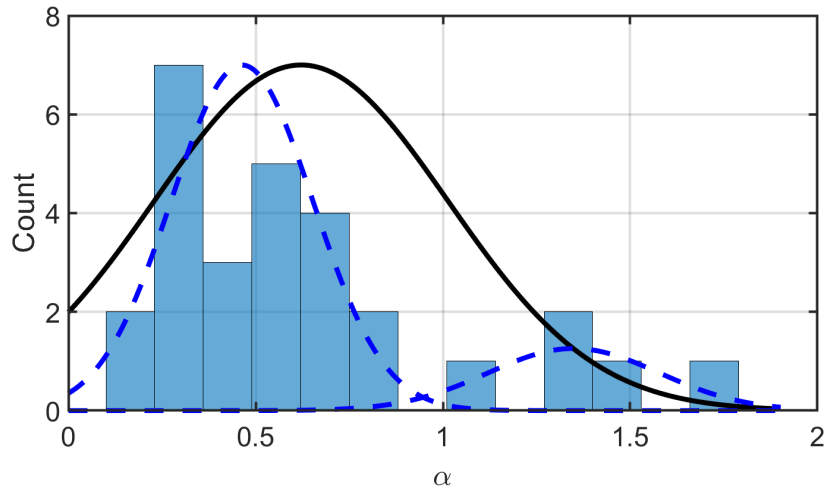

Supplemental figure 1: Distribution of  $\alpha$  for the mono-exponential fits, for the 28 fits with an adjusted  $R^2$  value greater than 0.6. The single Gaussian is shown in full black lines, while the dashed blue lines show the distribution following two Gaussians.

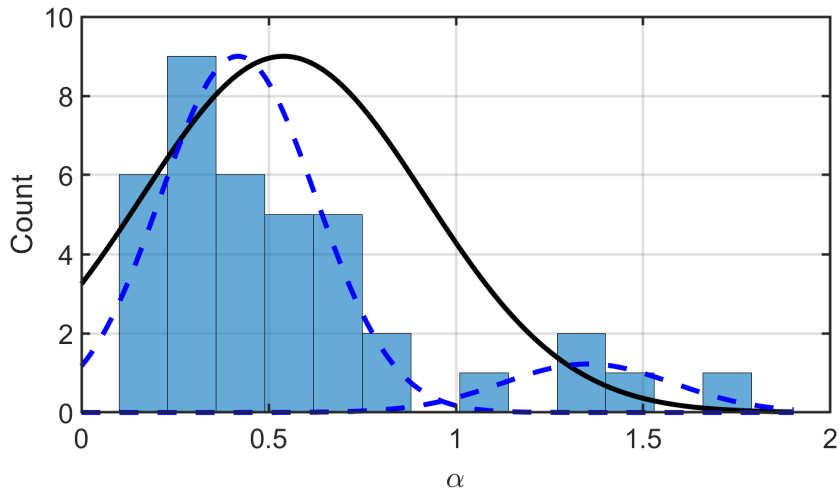

Supplemental figure 2: Distribution of  $\alpha$  for the mono-exponential fits, for the 38 fits with an adjusted  $R^2$  value greater than 0.3. The single Gaussian is shown in full black lines, while the dashed blue lines show the distribution following two Gaussians.

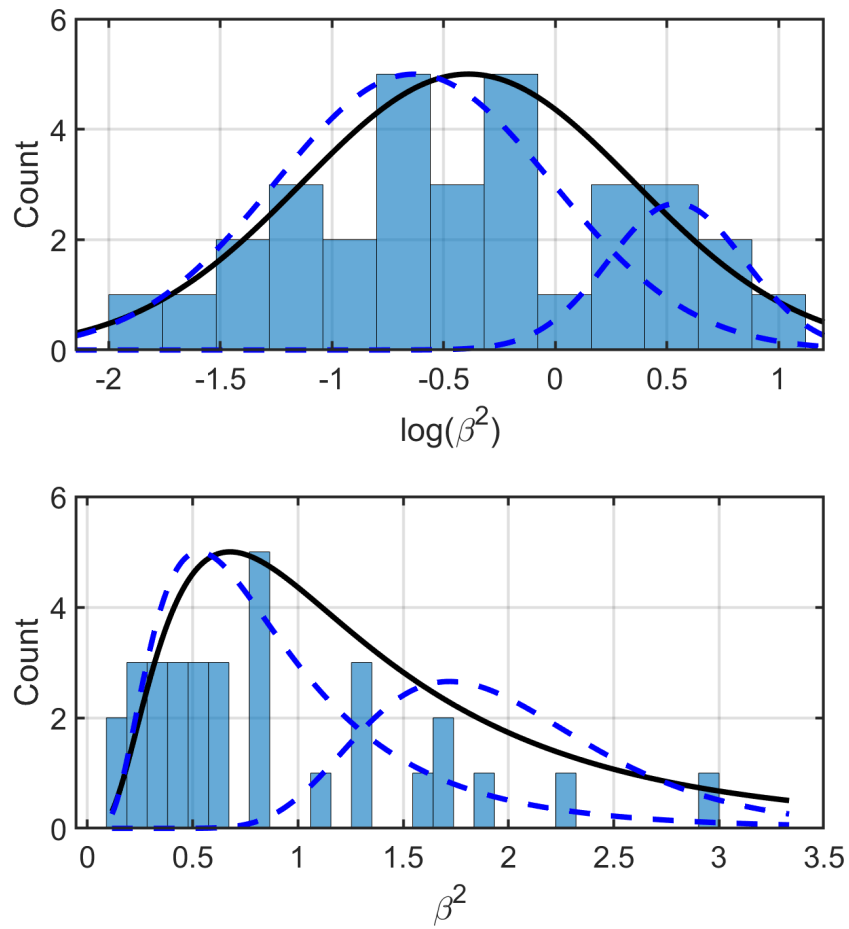

Supplemental figure 3: Distribution of  $\beta^2$  for the bi-exponential fits, for the 32 fits with an adjusted  $R^2$  value greater than 0.6. Top: Logarithmic first axis, bottom: Linear first axis. The single Gaussian is shown in full black lines, while the dashed blue lines show the distribution following two Gaussians.

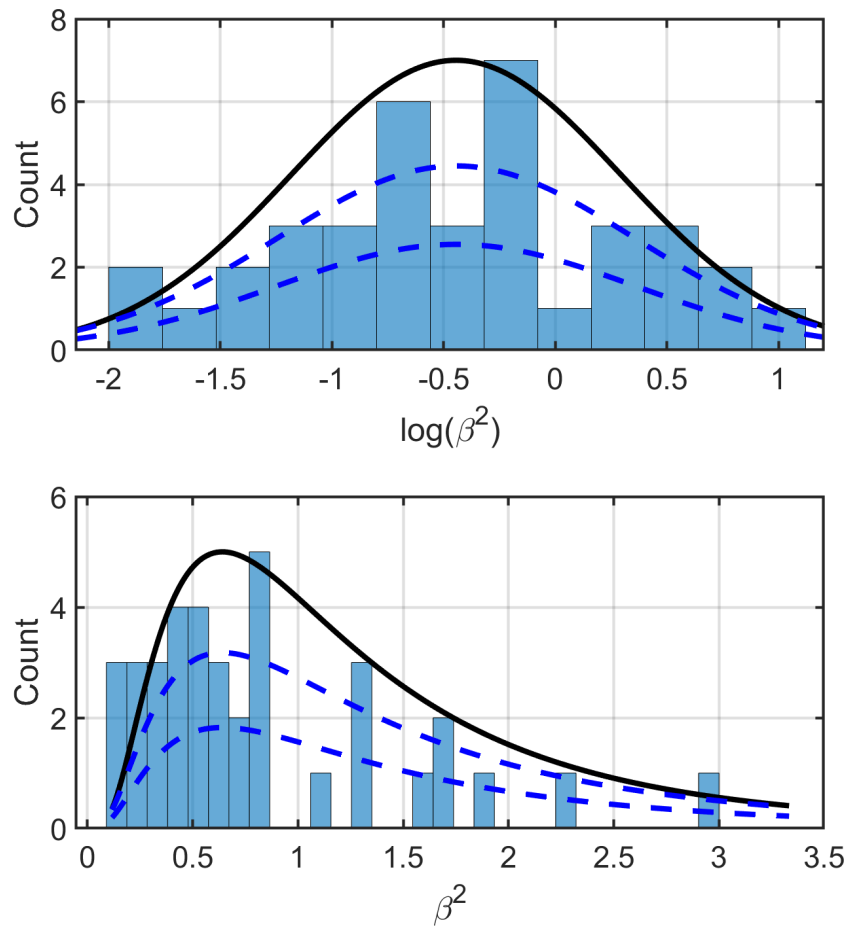

Supplemental figure 4: Distribution of  $\beta^2$  for the bi-exponential fits, for the 37 fits with an adjusted  $R^2$  value greater than 0.3. Top: Logarithmic first axis, bottom: Linear first axis. The single Gaussian is shown in full black lines, while the dashed blue lines show the distribution following two Gaussians.

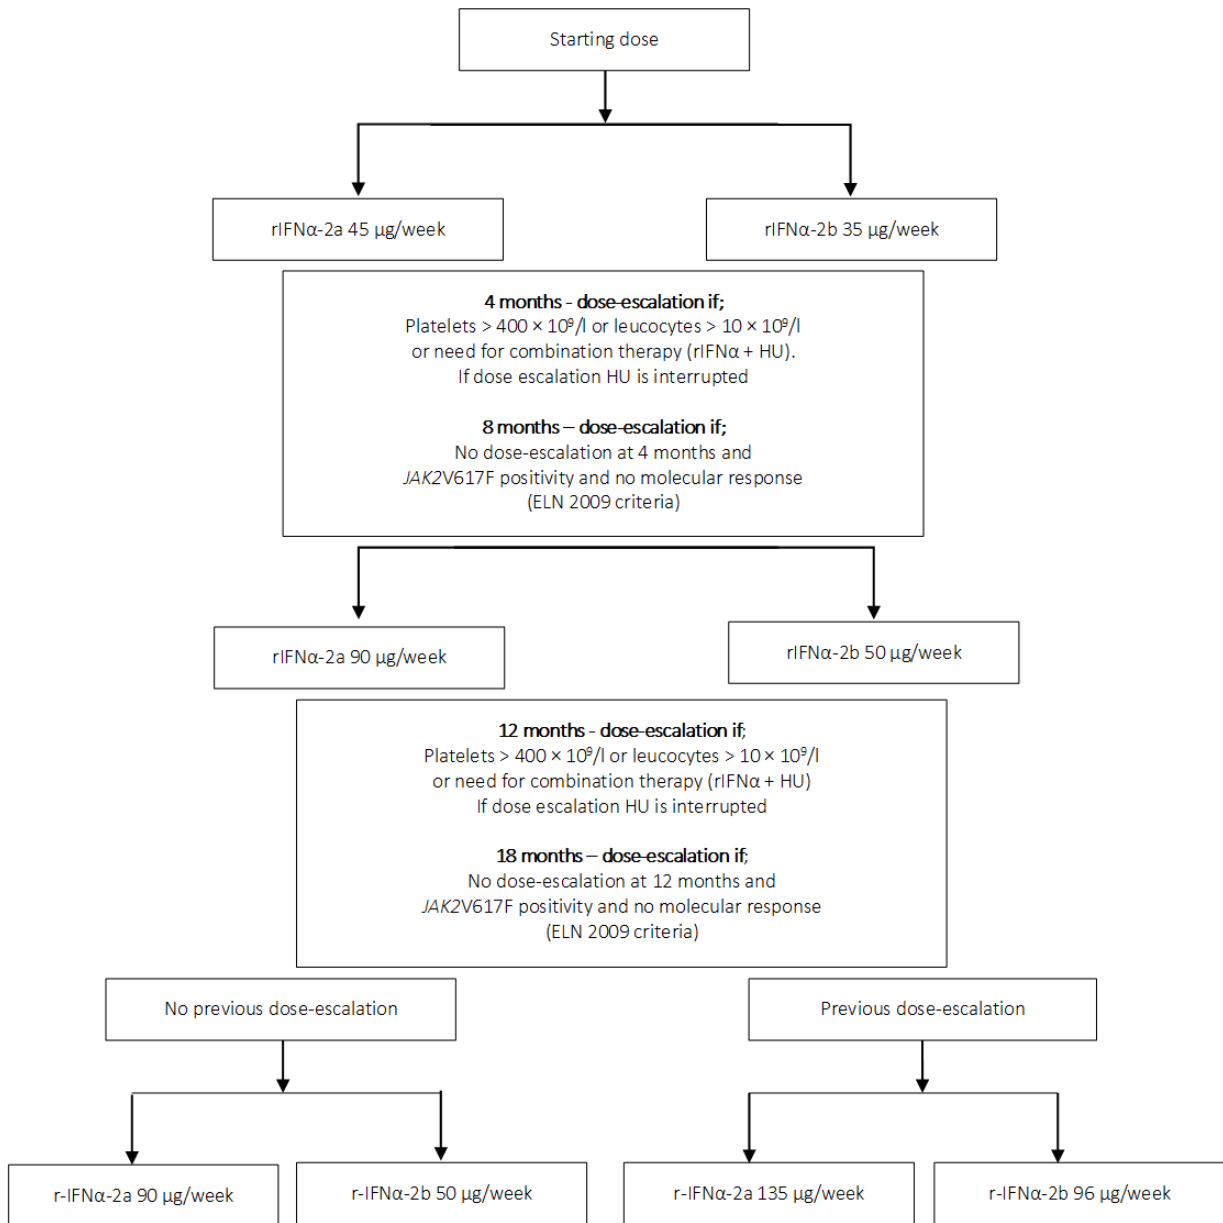

Supplemental figure 5: Chart for IFN dose-escalation

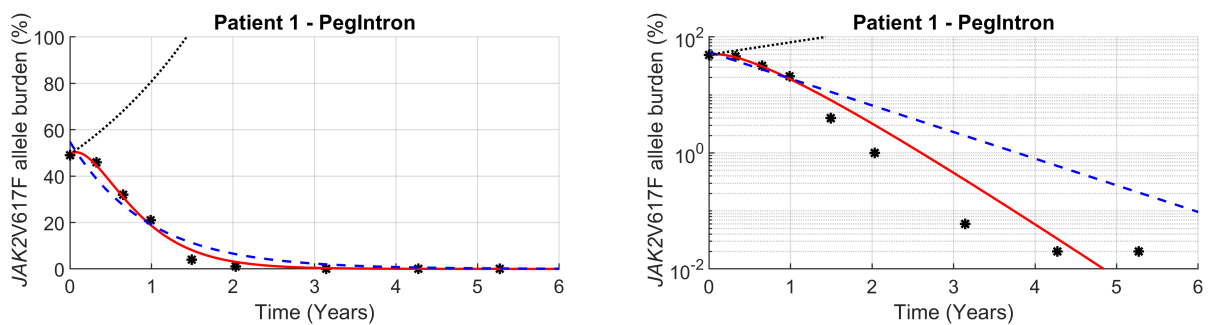

Supplemental figure 6: Data and model fits for patient 1. Data is shown as black stars, mono-exponential fit is shown as a dashed blue line and the bi-exponential fit is shown a full red line. An extrapolation of continued exponential growth is shown in a dotted black line. The right-hand figure displays the same as the left-hand figure, but on a logarithmic y-axis. On a logarithmic y-axis, the mono-exponential decay appears as a straight line, allowing for a simple visual check of the decay-rates.

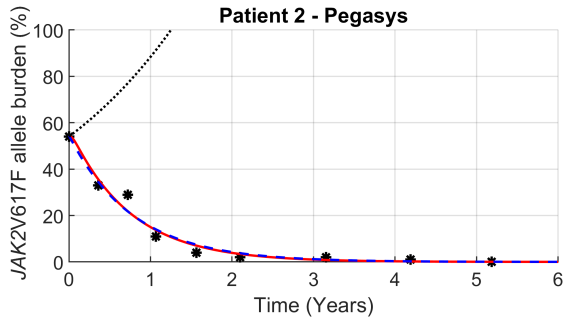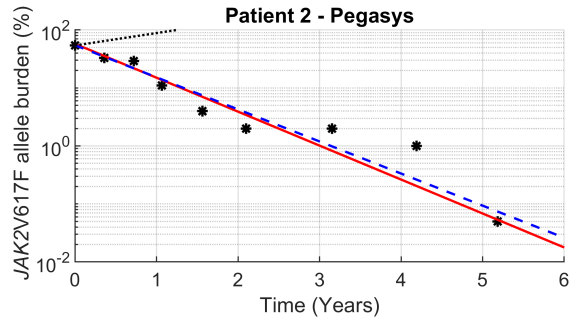

Supplemental figure 7: Data and model fits for patient 2, see legend of Supplemental figure 6

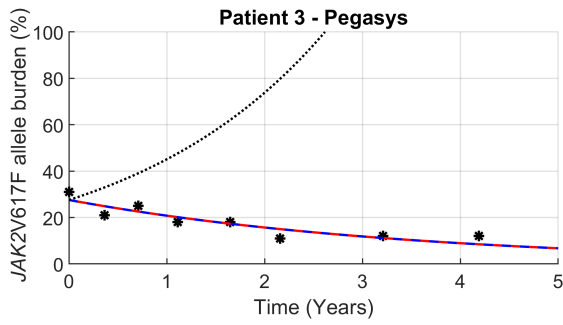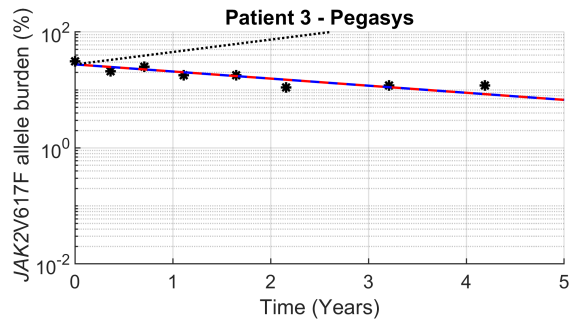

Supplemental figure 8: Data and model fits for patient 3, see legend of Supplemental figure 6

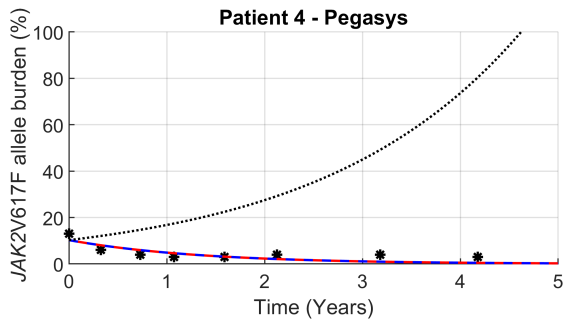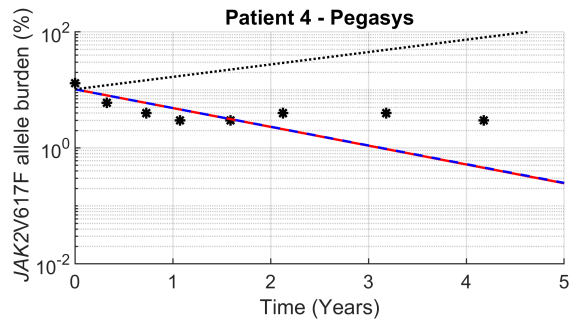

Supplemental figure 9: Data and model fits for patient 4, see legend of Supplemental figure 6

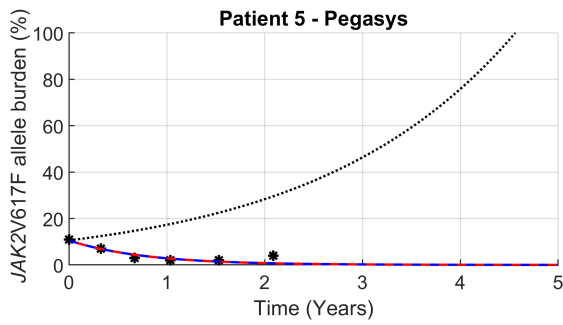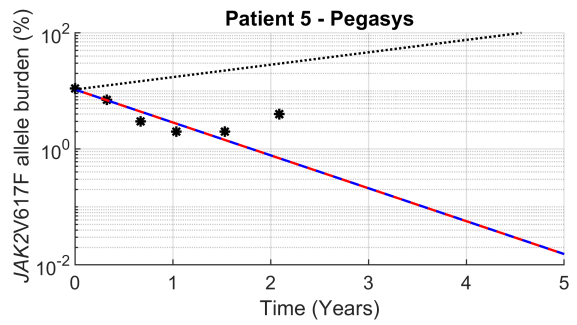

Supplemental figure 10: Data and model fits for patient 5, see legend of Supplemental figure 6

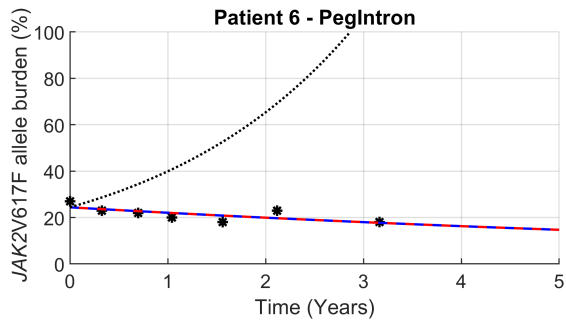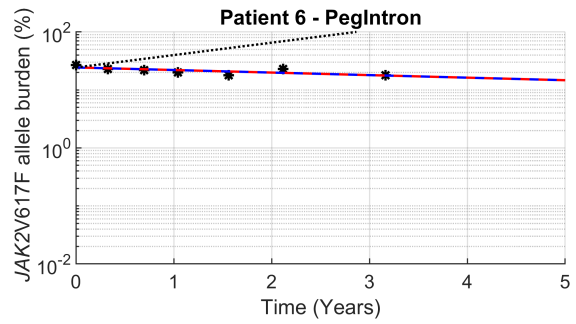

Supplemental figure 11: Data and model fits for patient 6, see legend of Supplemental figure 6

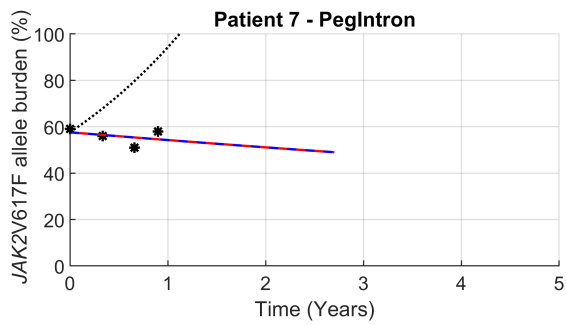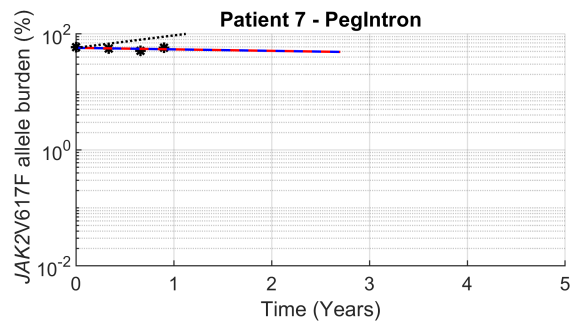

Supplemental figure 12: Data and model fits for patient 7, see legend of Supplemental figure 6

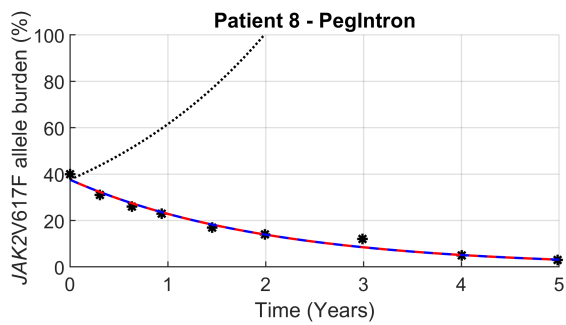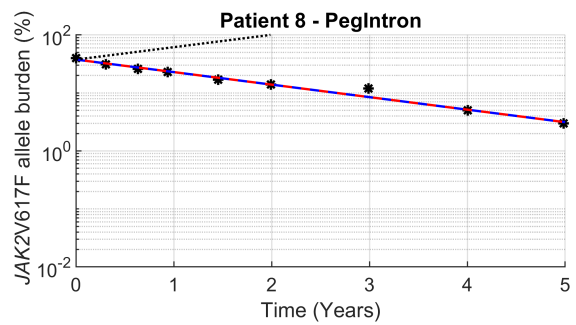

Supplemental figure 13: Data and model fits for patient 8, see legend of Supplemental figure 6

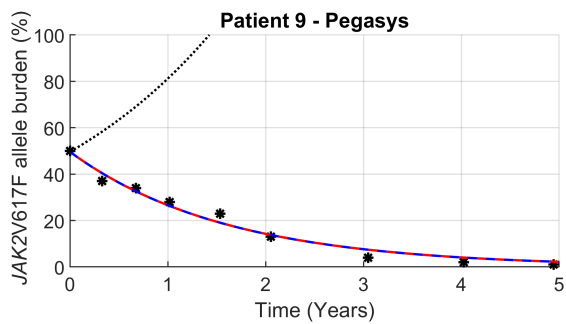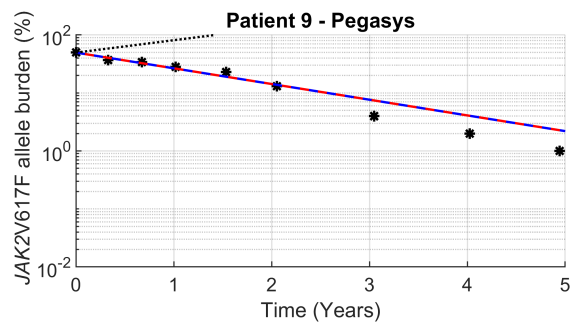

Supplemental figure 14: Data and model fits for patient 9, see legend of Supplemental figure 6

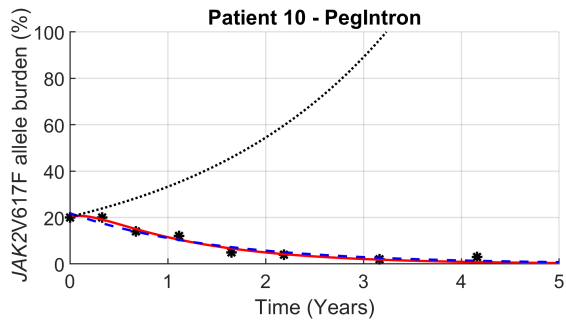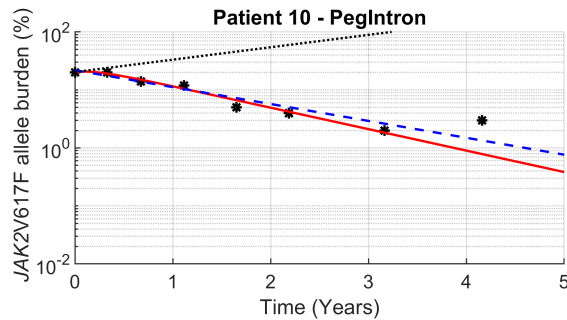

Supplemental figure 15: Data and model fits for patient 10, see legend of Supplemental figure 6

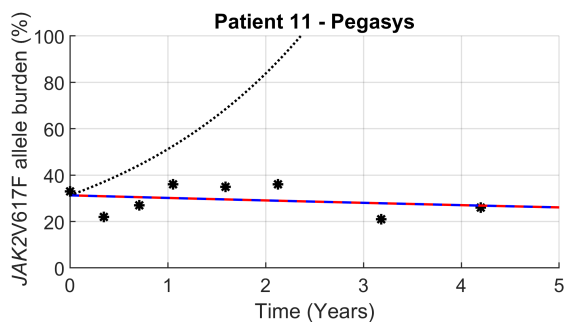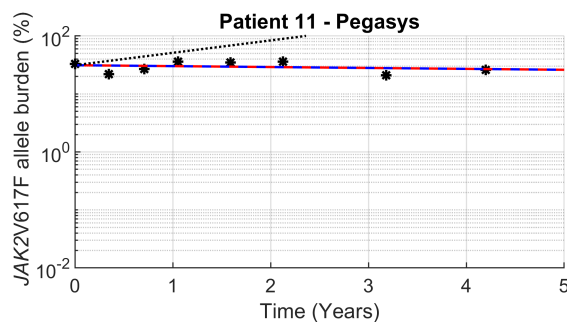

Supplemental figure 16: Data and model fits for patient 11, see legend of Supplemental figure 6

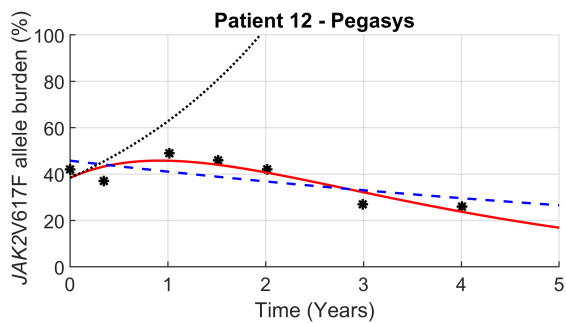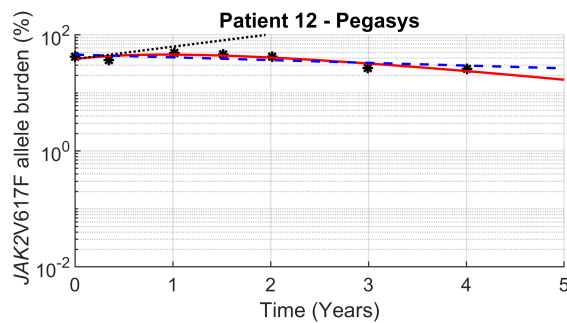

Supplemental figure 17: Data and model fits for patient 12, see legend of Supplemental figure 6

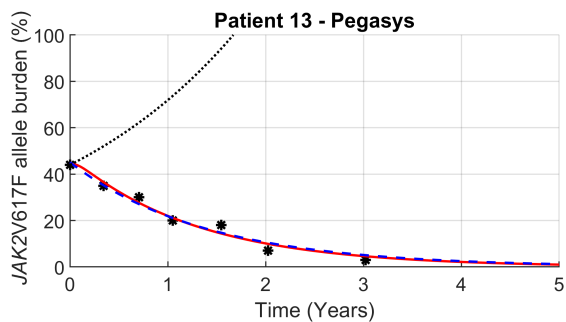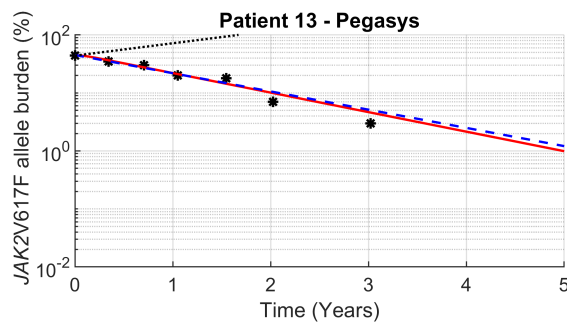

Supplemental figure 18: Data and model fits for patient 13, see legend of Supplemental figure 6



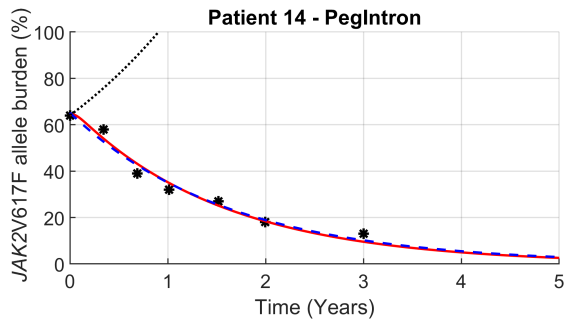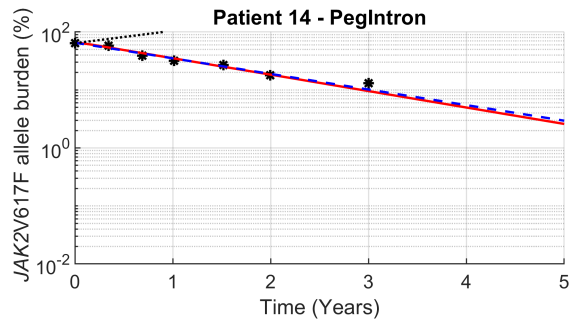

Supplemental figure 19: Data and model fits for patient 14, see legend of Supplemental figure 6

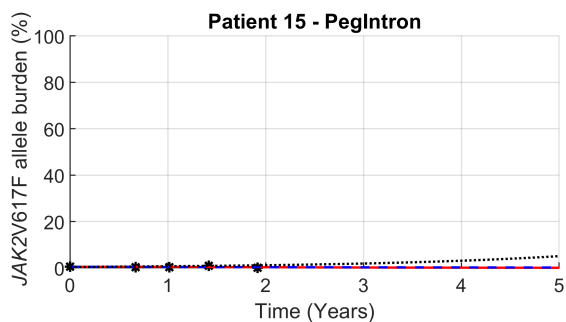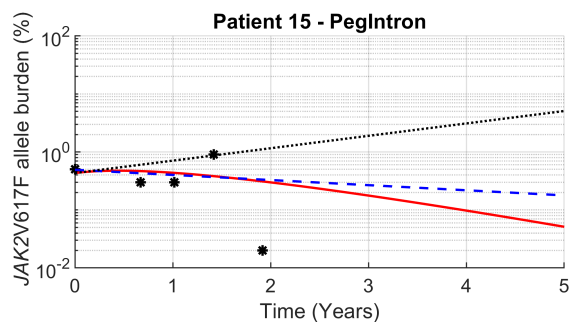

Supplemental figure 20: Data and model fits for patient 15, see legend of Supplemental figure 6

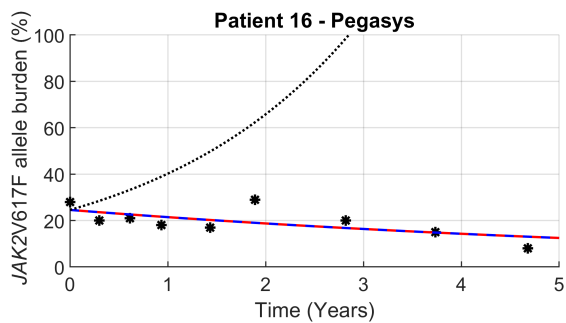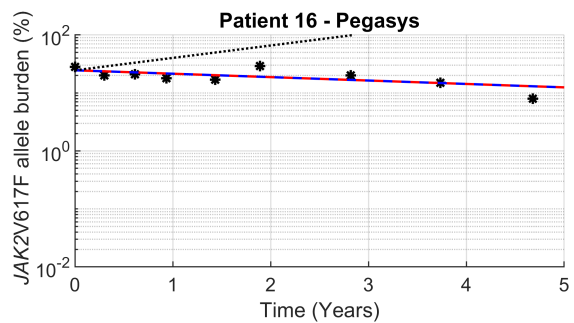

Supplemental figure 21: Data and model fits for patient 16, see legend of Supplemental figure 6

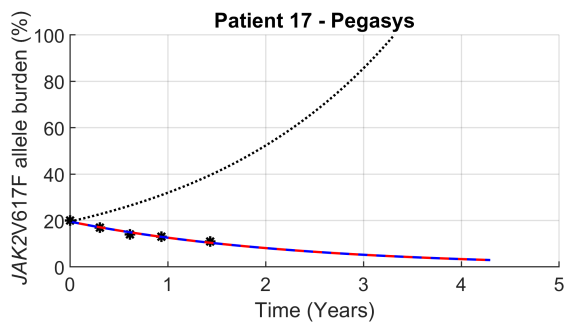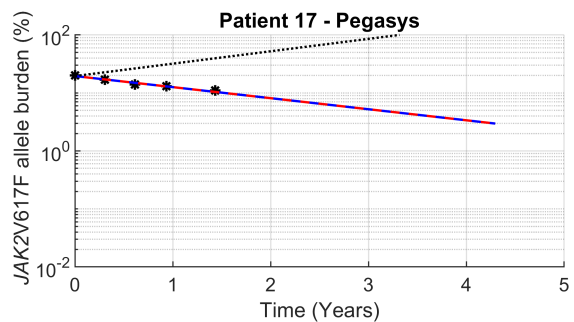

Supplemental figure 22: Data and model fits for patient 17, see legend of Supplemental figure 6

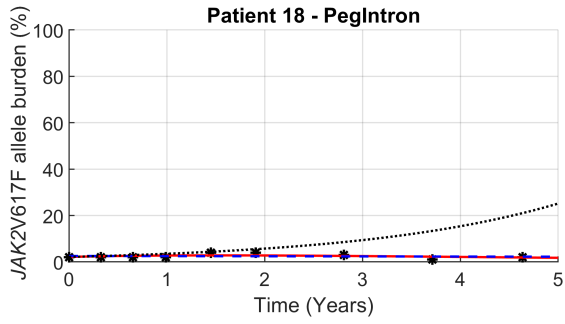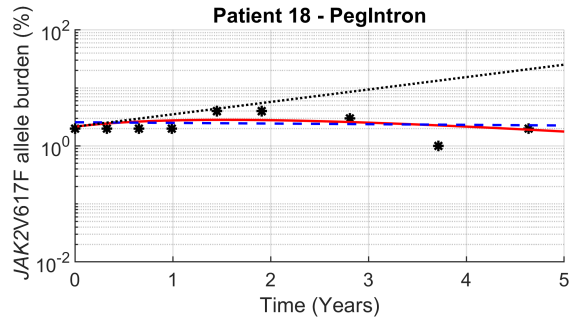

Supplemental figure 23: Data and model fits for patient 18, see legend of Supplemental figure 6

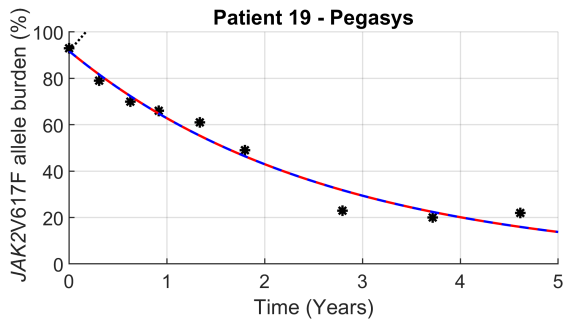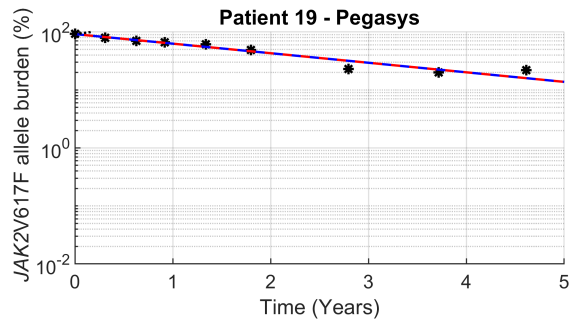

Supplemental figure 24: Data and model fits for patient 19, see legend of Supplemental figure 6

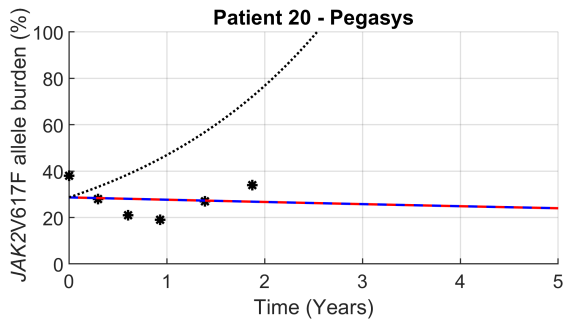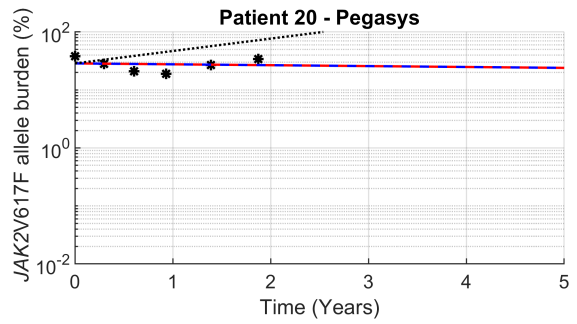

Supplemental figure 25: Data and model fits for patient 20, see legend of Supplemental figure 6

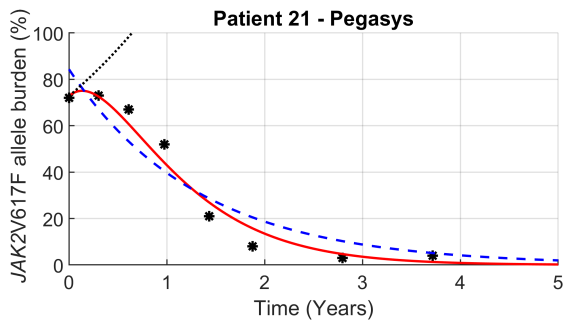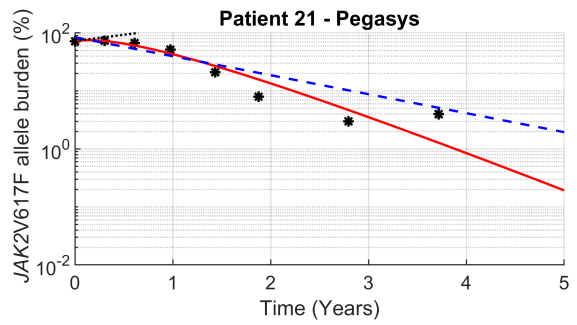

Supplemental figure 26: Data and model fits for patient 21, see legend of Supplemental figure 6

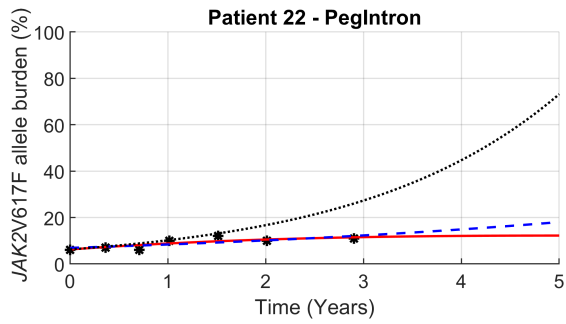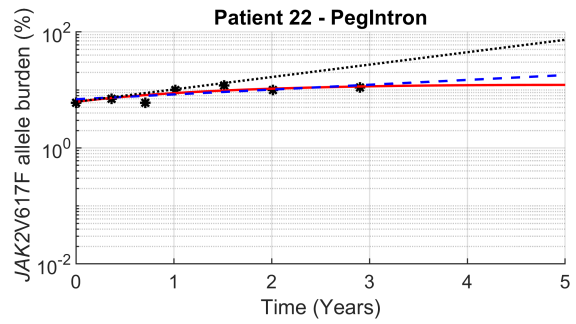

Supplemental figure 27: Data and model fits for patient 22, see legend of Supplemental figure 6

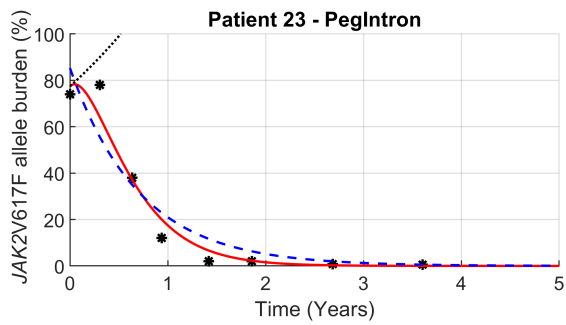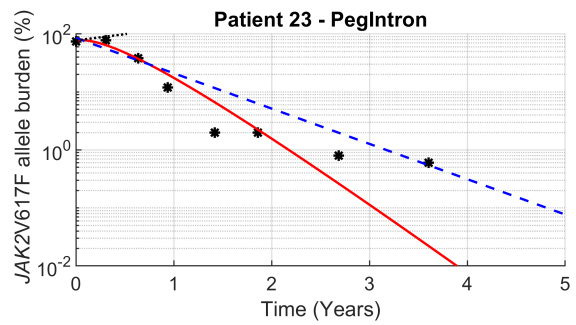

Supplemental figure 28: Data and model fits for patient 23, see legend of Supplemental figure 6

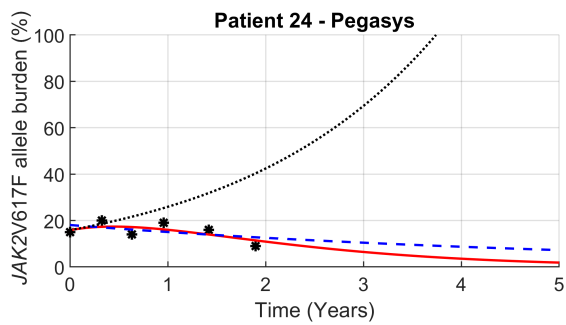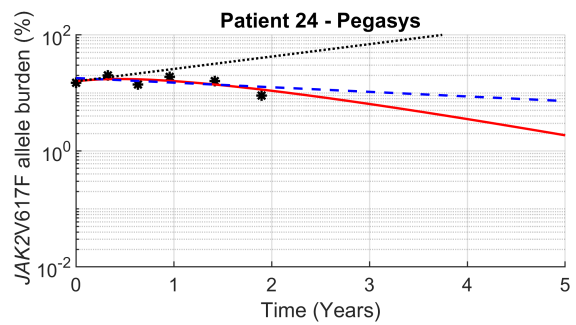

Supplemental figure 29: Data and model fits for patient 24, see legend of Supplemental figure 6

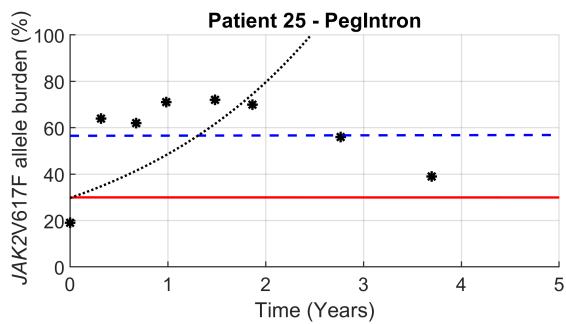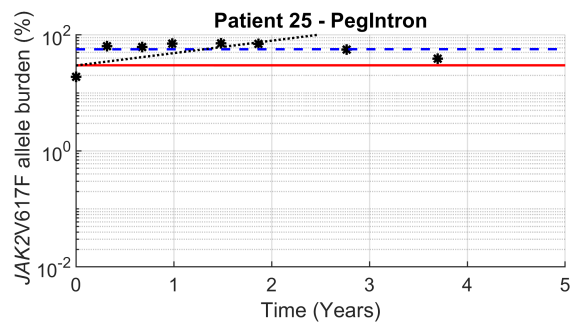

Supplemental figure 30: Data and model fits for patient 25, see legend of Supplemental figure 6

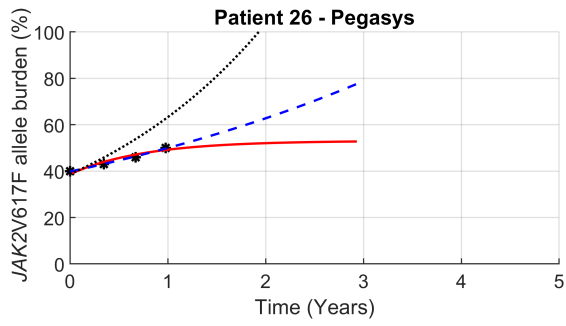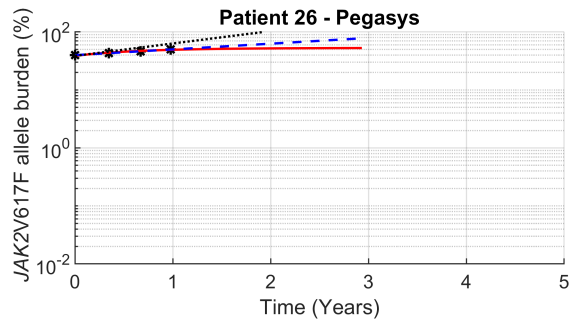

Supplemental figure 31: Data and model fits for patient 26, see legend of Supplemental figure 6

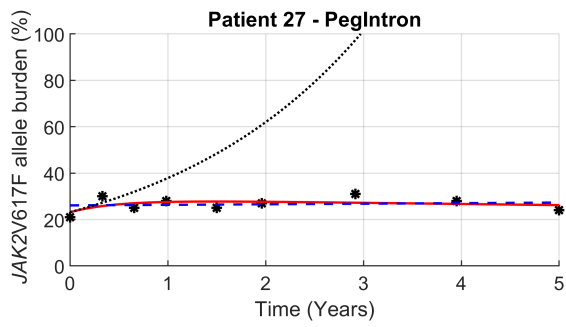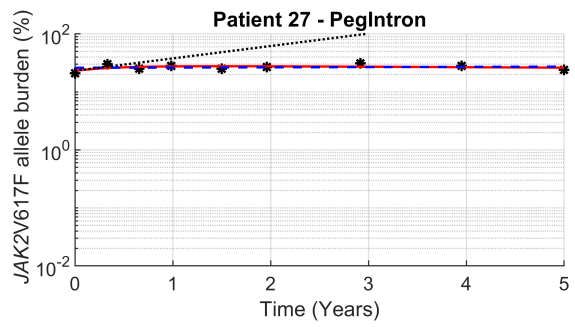

Supplemental figure 32: Data and model fits for patient 27, see legend of Supplemental figure 6

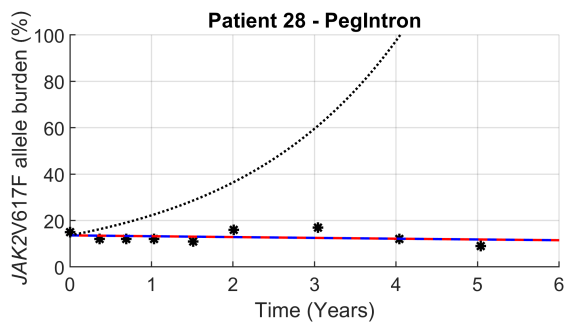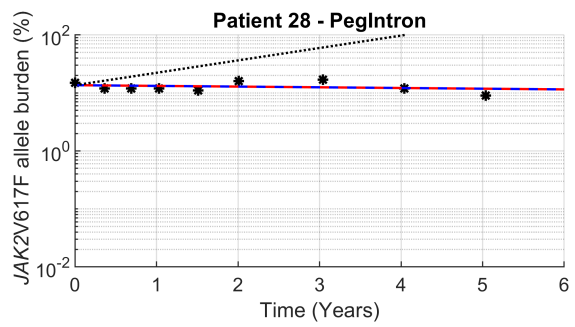

Supplemental figure 33: Data and model fits for patient 28, see legend of Supplemental figure 6

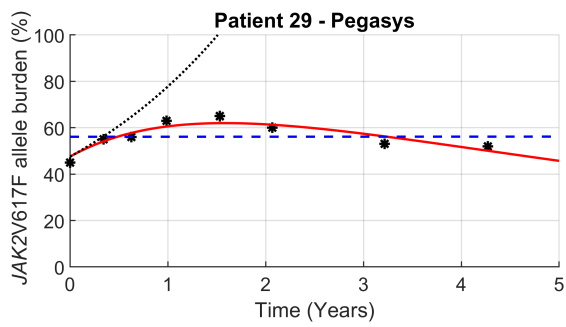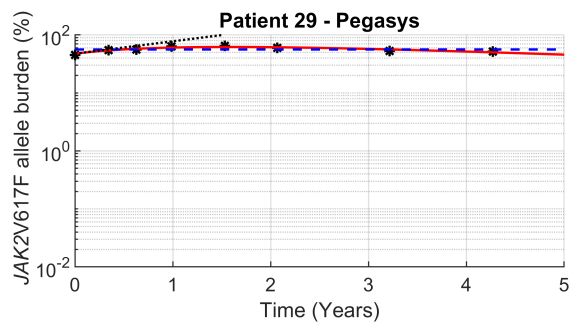

Supplemental figure 34: Data and model fits for patient 29, see legend of Supplemental figure 6

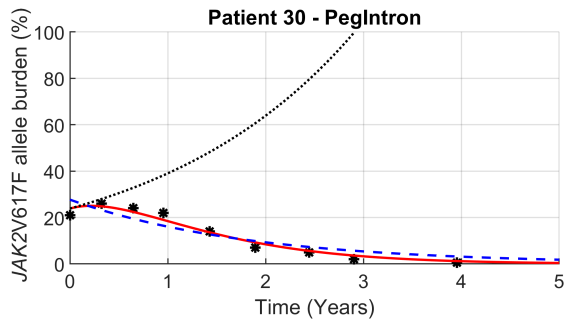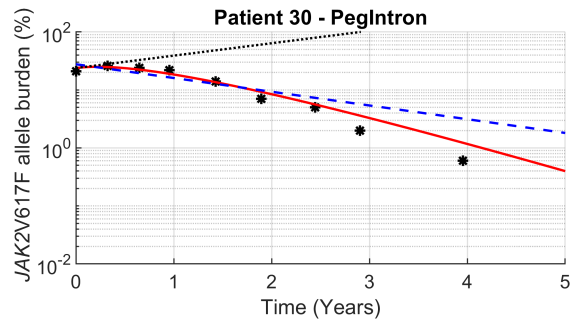

Supplemental figure 35: Data and model fits for patient 30, see legend of Supplemental figure 6

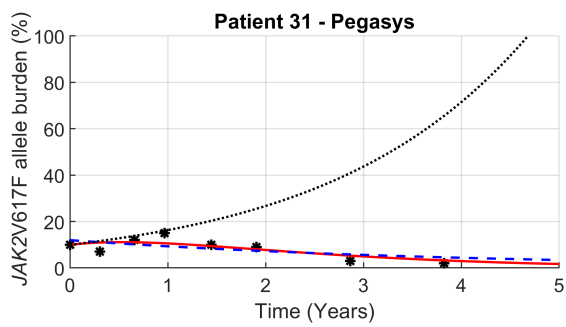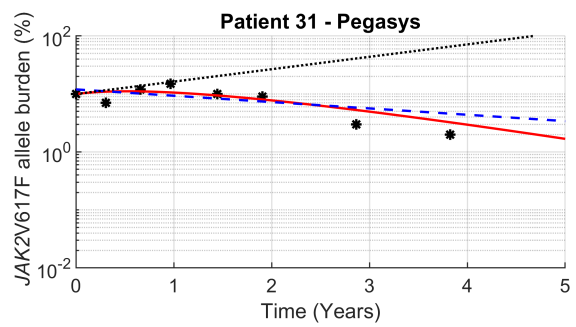

Supplemental figure 36: Data and model fits for patient 31, see legend of Supplemental figure 6

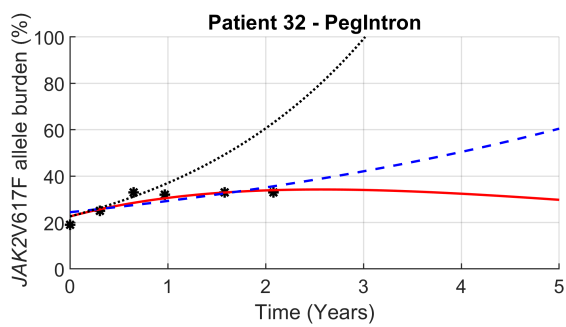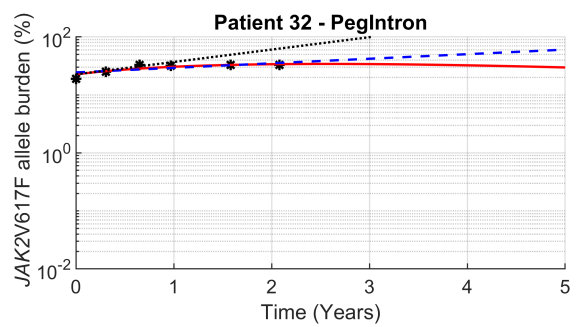

Supplemental figure 37: Data and model fits for patient 32, see legend of Supplemental figure 6

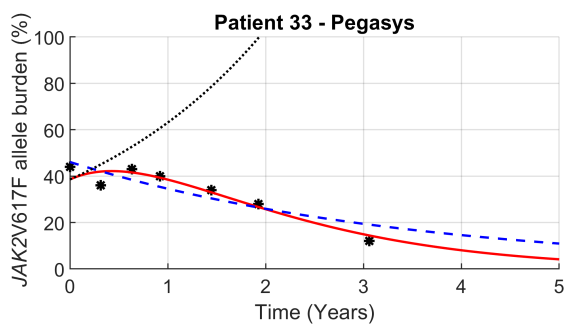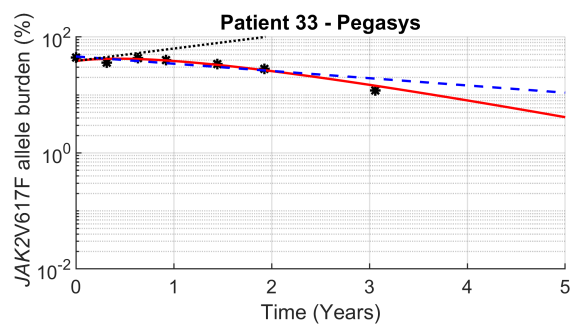

Supplemental figure 38: Data and model fits for patient 33, see legend of Supplemental figure 6

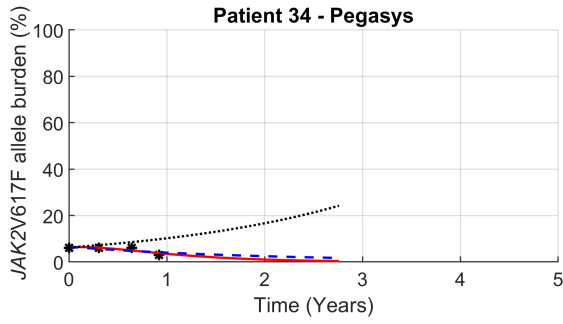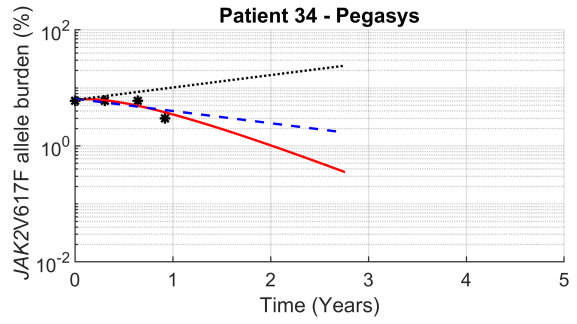

Supplemental figure 39: Data and model fits for patient 34, see legend of Supplemental figure 6

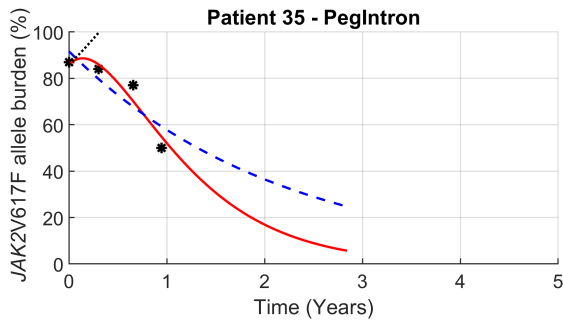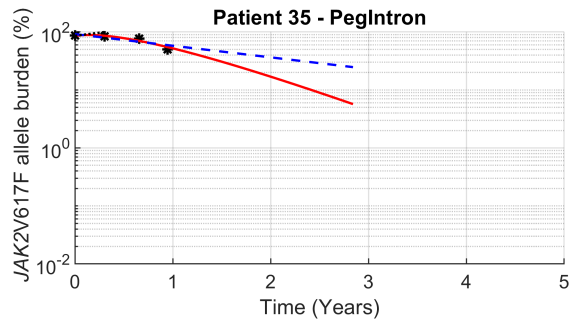

Supplemental figure 40: Data and model fits for patient 35, see legend of Supplemental figure 6

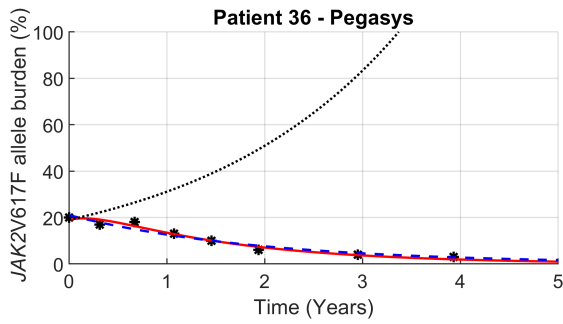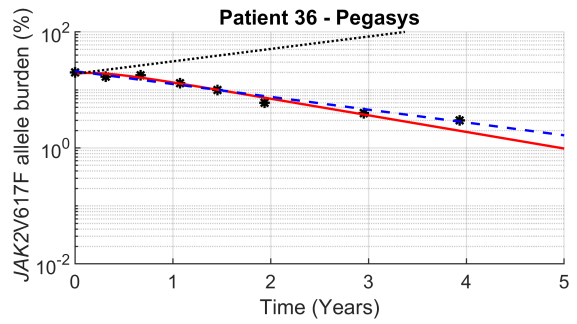

Supplemental figure 41: Data and model fits for patient 36, see legend of Supplemental figure 6

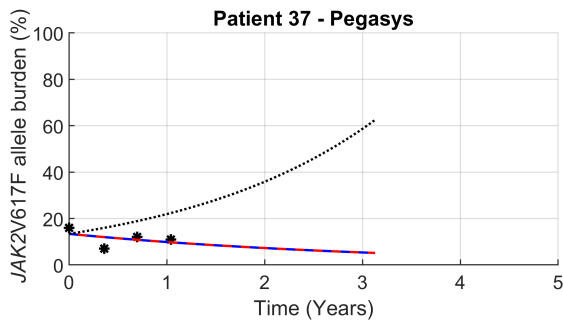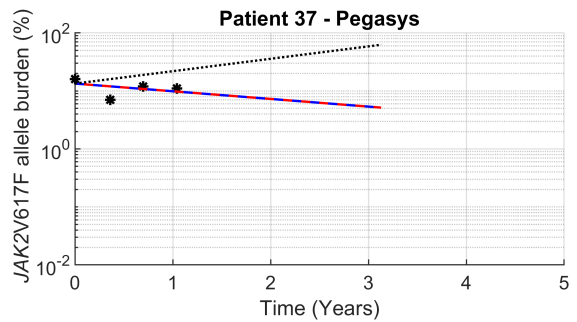

Supplemental figure 42: Data and model fits for patient 37, see legend of Supplemental figure 6

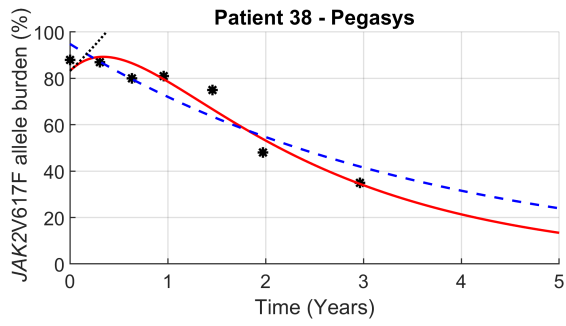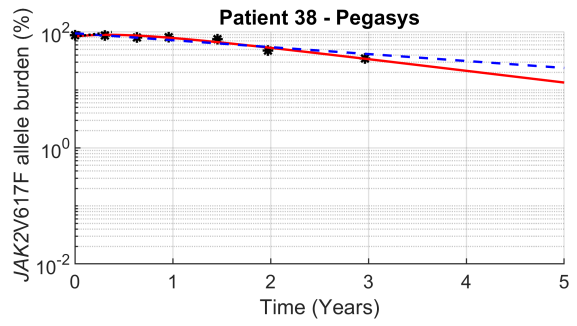

Supplemental figure 43: Data and model fits for patient 38, see legend of Supplemental figure 6

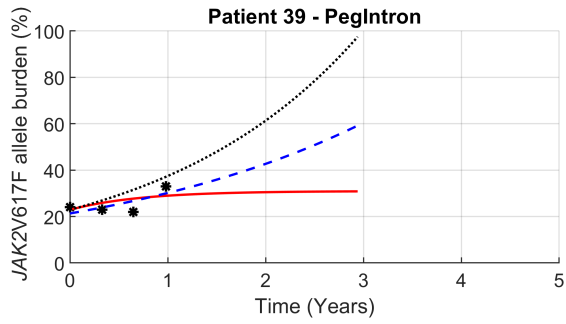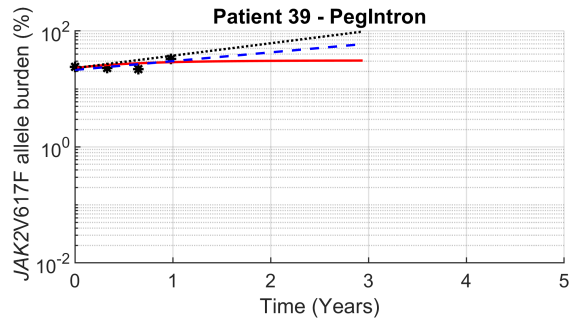

Supplemental figure 44: Data and model fits for patient 39, see legend of Supplemental figure 6

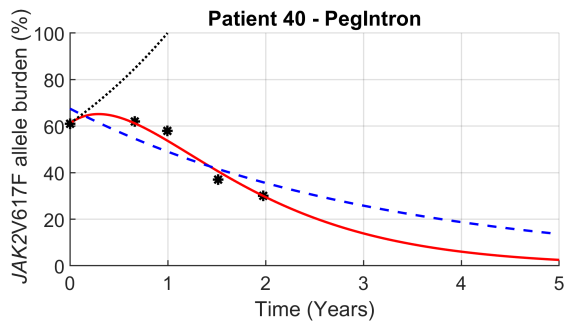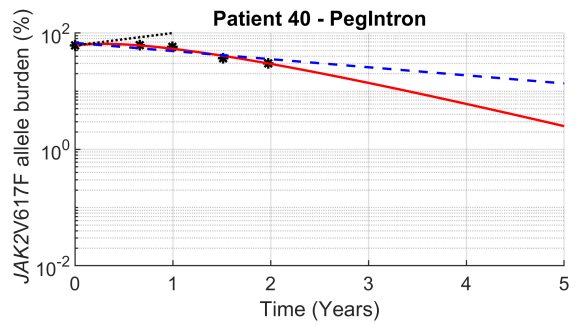

Supplemental figure 45: Data and model fits for patient 40, see legend of Supplemental figure 6

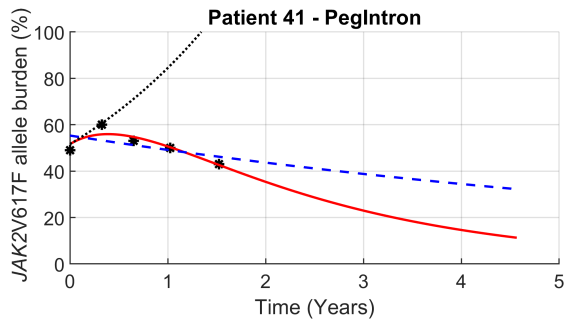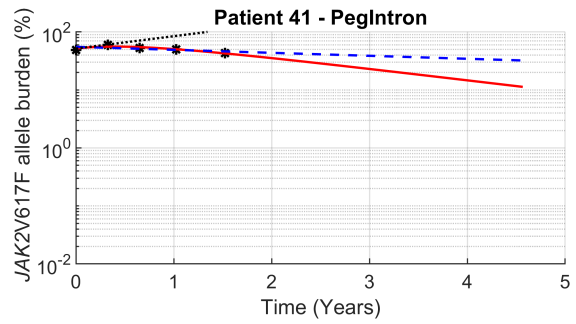

Supplemental figure 46: Data and model fits for patient 41, see legend of Supplemental figure 6

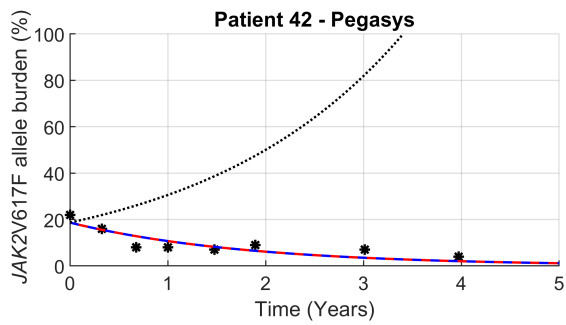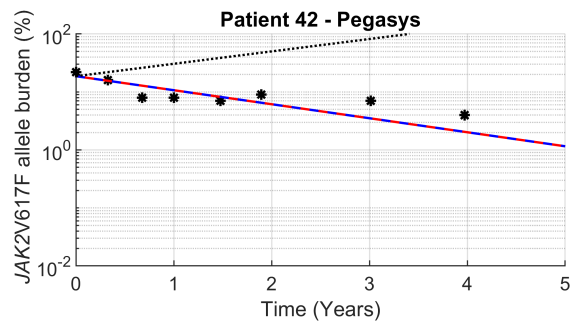

Supplemental figure 47: Data and model fits for patient 42, see legend of Supplemental figure 6

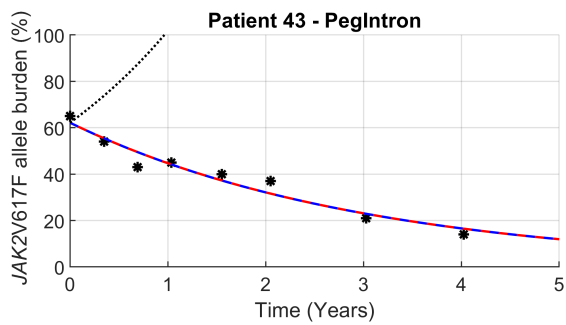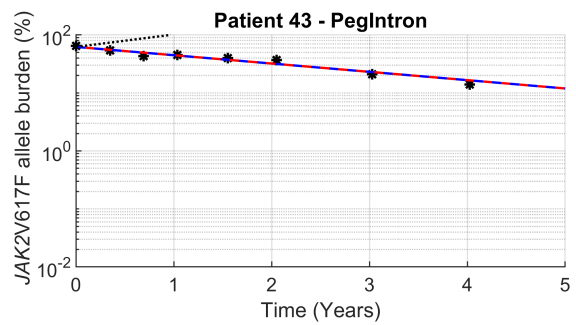

Supplemental figure 48: Data and model fits for patient 43, see legend of Supplemental figure 6

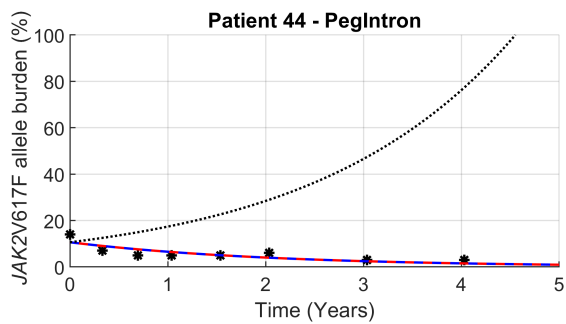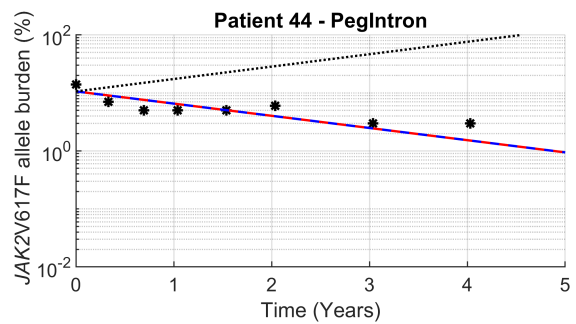

Supplemental figure 49: Data and model fits for patient 44, see legend of Supplemental figure 6



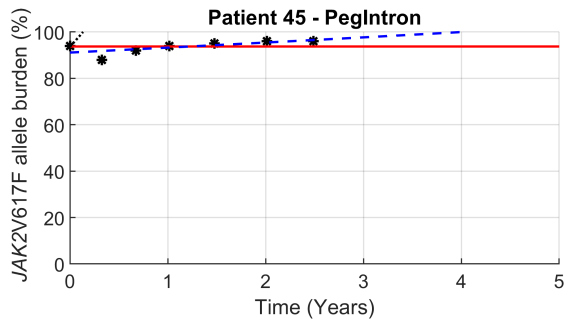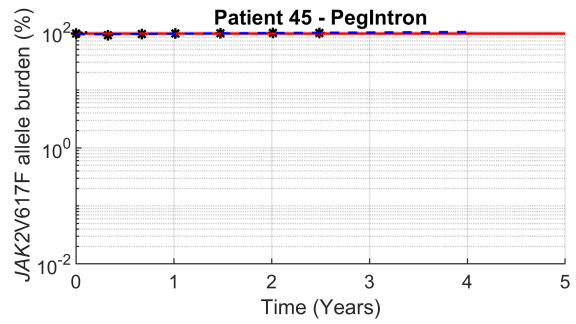

Supplemental figure 50: Data and model fits for patient 45, see legend of Supplemental figure 6

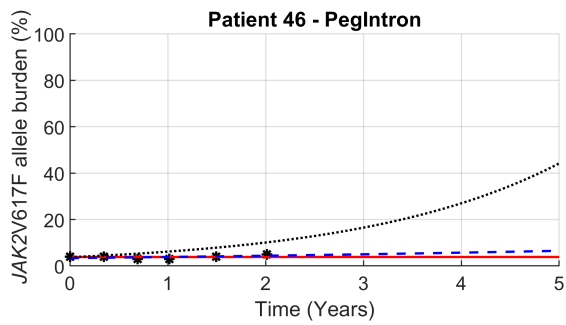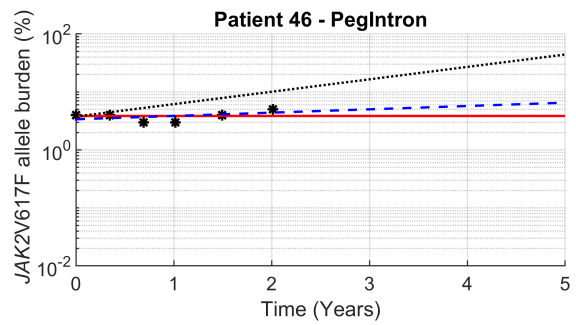

Supplemental figure 51: Data and model fits for patient 46, see legend of Supplemental figure 6

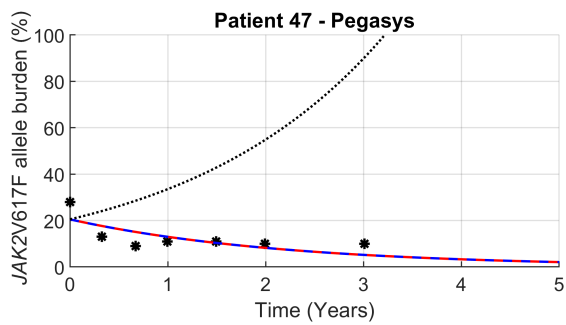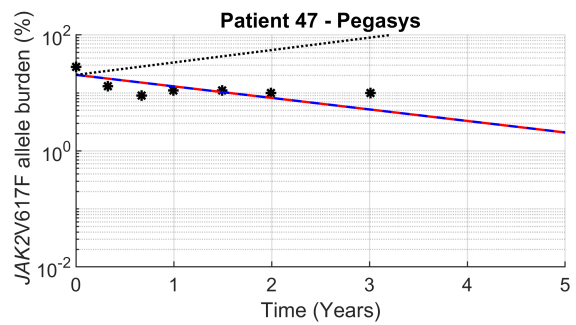

Supplemental figure 52: Data and model fits for patient 47, see legend of Supplemental figure 6

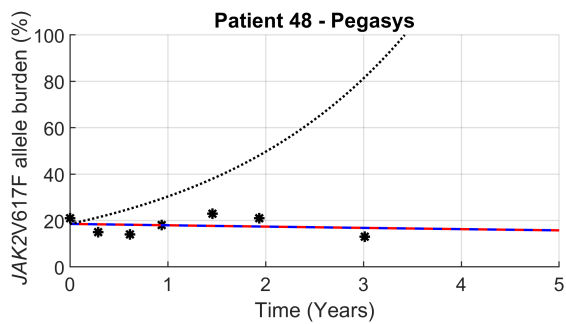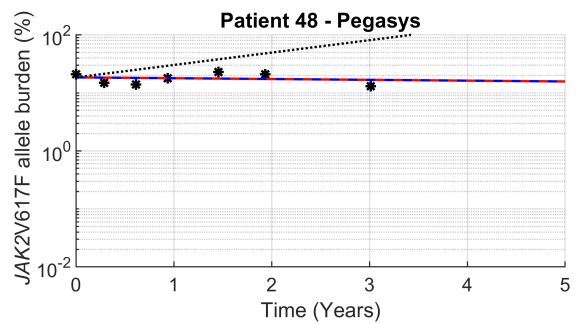

Supplemental figure 53: Data and model fits for patient 48, see legend of Supplemental figure 6

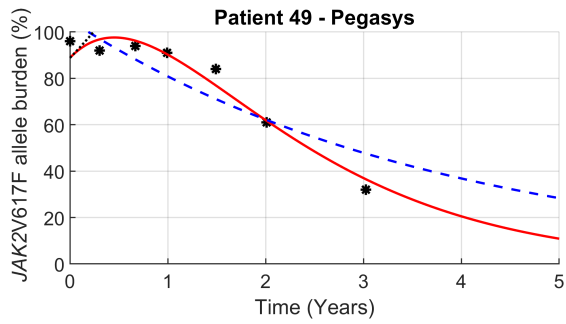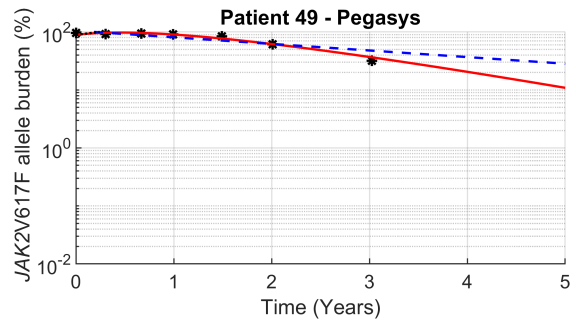

Supplemental figure 54: Data and model fits for patient 49, see legend of Supplemental figure 6

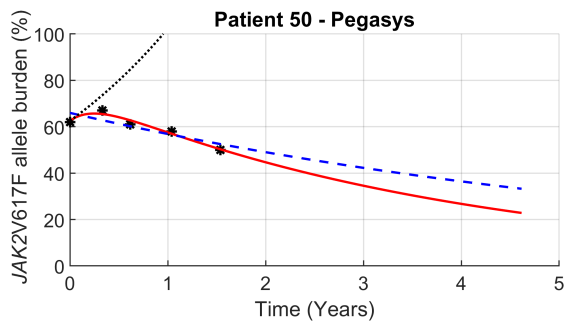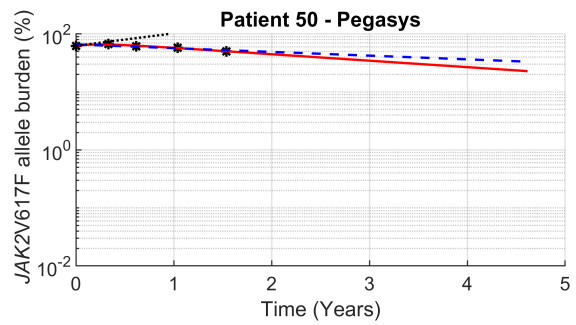

Supplemental figure 55: Data and model fits for patient 50, see legend of Supplemental figure 6

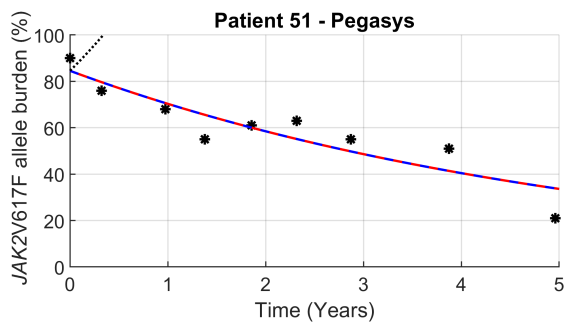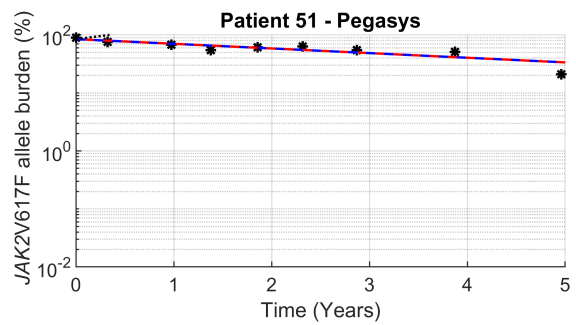

Supplemental figure 56: Data and model fits for patient 51, see legend of Supplemental figure 6

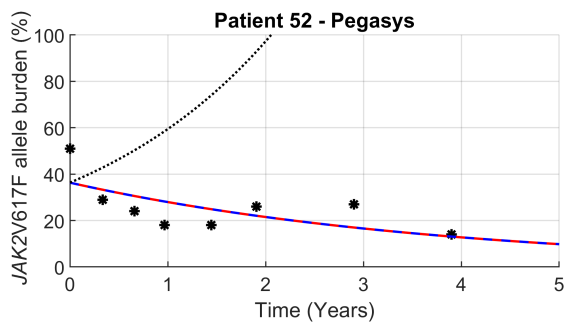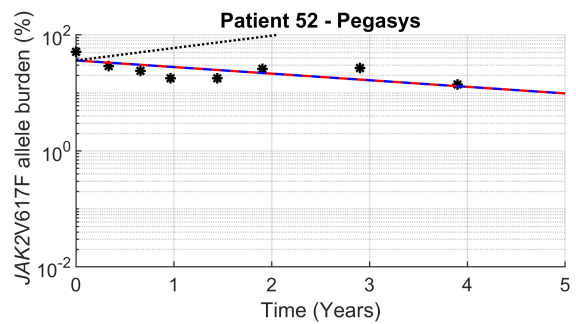

Supplemental figure 57: Data and model fits for patient 52, see legend of Supplemental figure 6

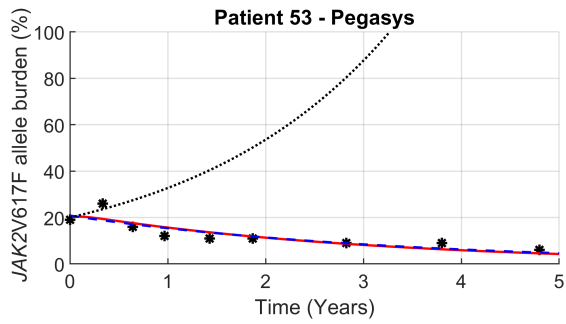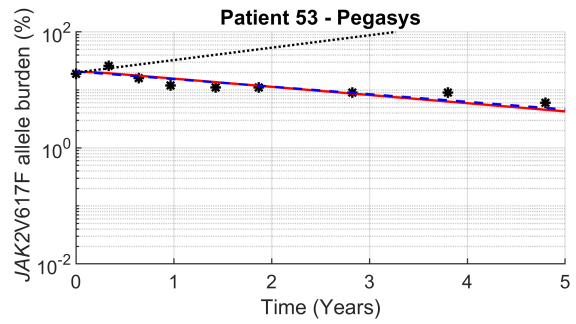

Supplemental figure 58: Data and model fits for patient 53, see legend of Supplemental figure 6

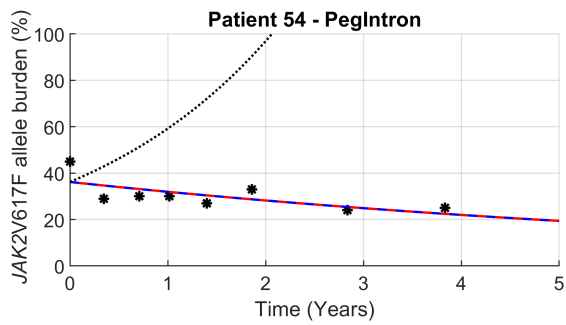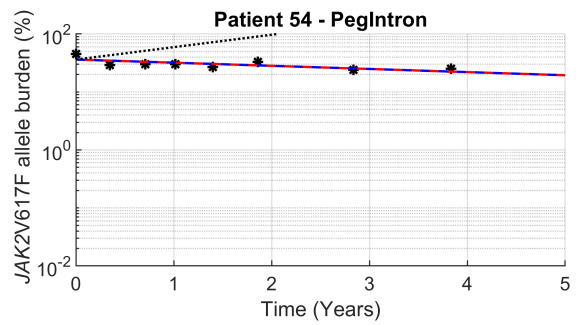

Supplemental figure 59: Data and model fits for patient 54, see legend of Supplemental figure 6

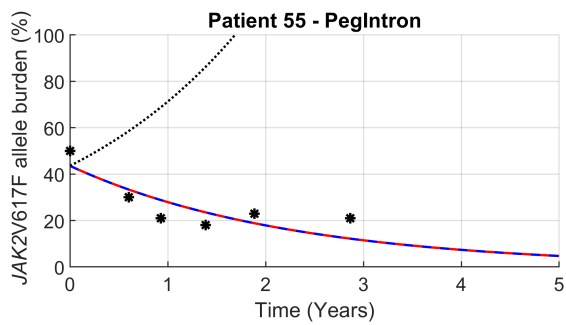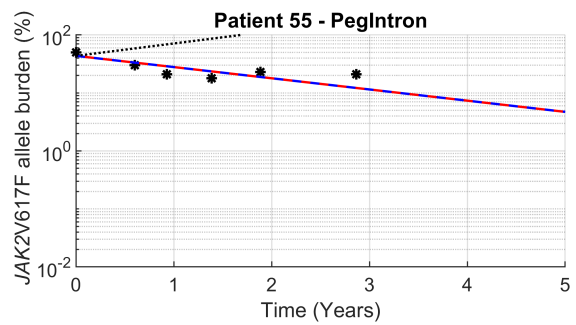

Supplemental figure 60: Data and model fits for patient 55, see legend of Supplemental figure 6

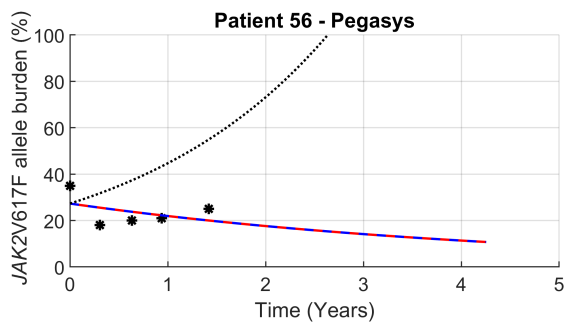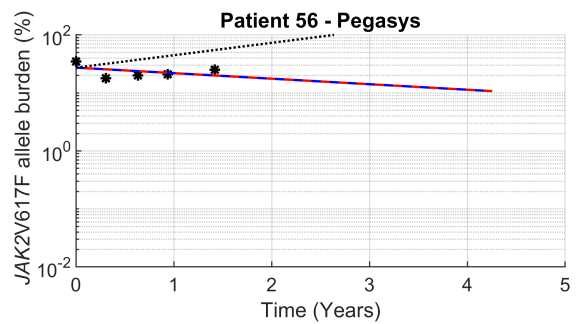

Supplemental figure 61: Data and model fits for patient 56, see legend of Supplemental figure 6

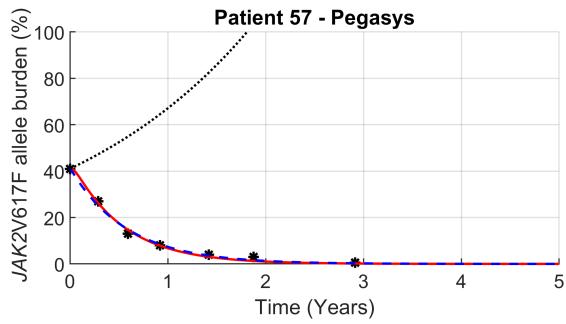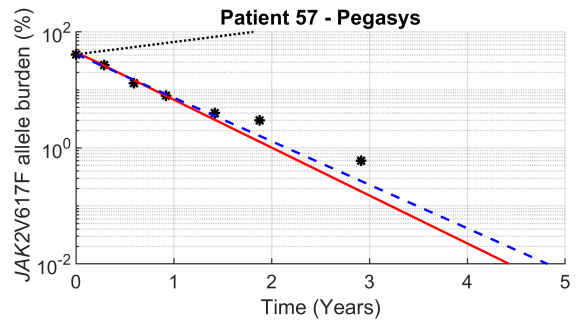

Supplemental figure 62: Data and model fits for patient 57, see legend of Supplemental figure 6

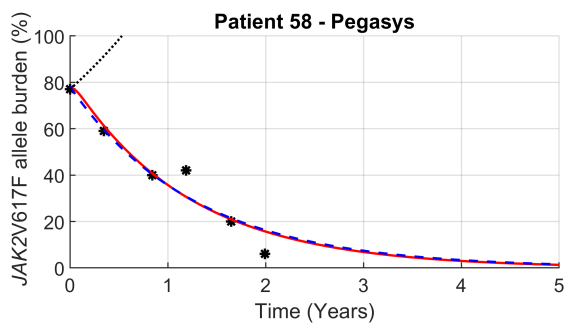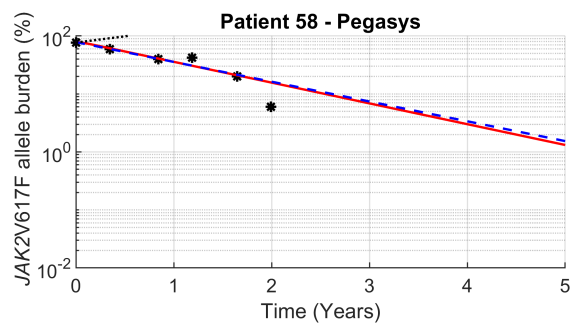

Supplemental figure 63: Data and model fits for patient 58, see legend of Supplemental figure 6

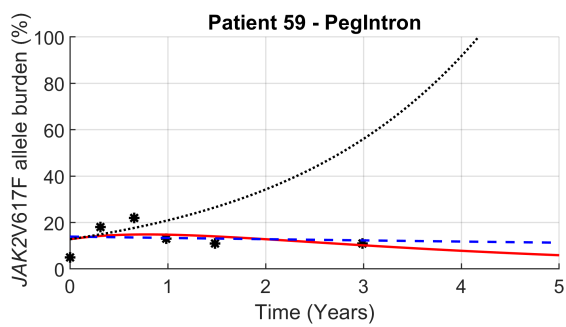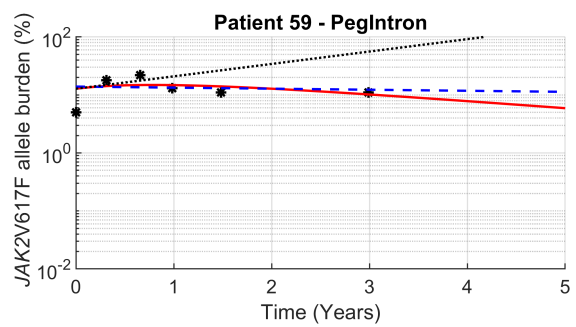

Supplemental figure 64: Data and model fits for patient 59, see legend of Supplemental figure 6

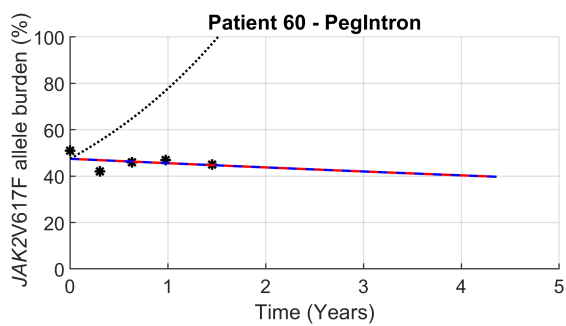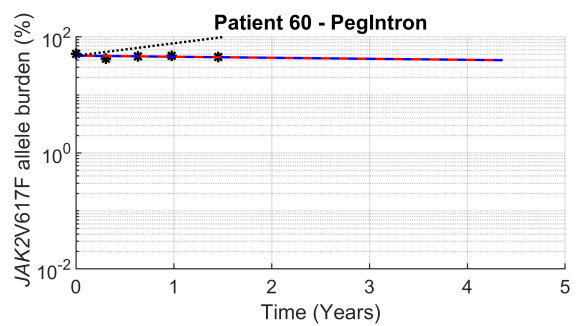

Supplemental figure 65: Data and model fits for patient 60, see legend of Supplemental figure 6

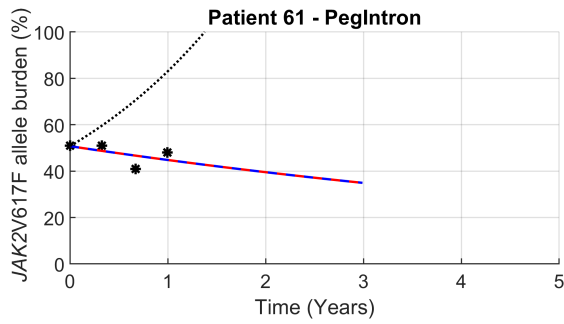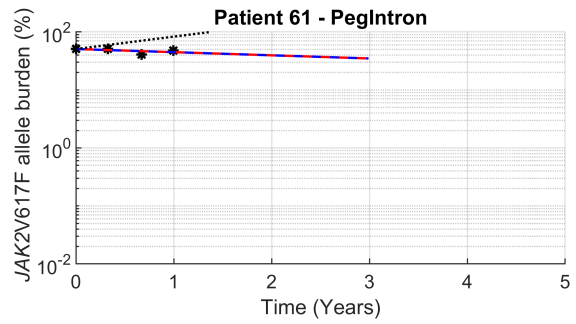

Supplemental figure 66: Data and model fits for patient 61, see legend of Supplemental figure 6

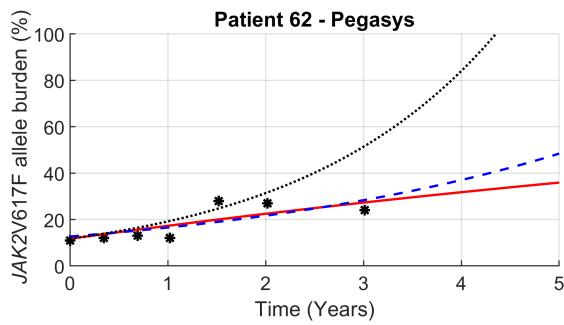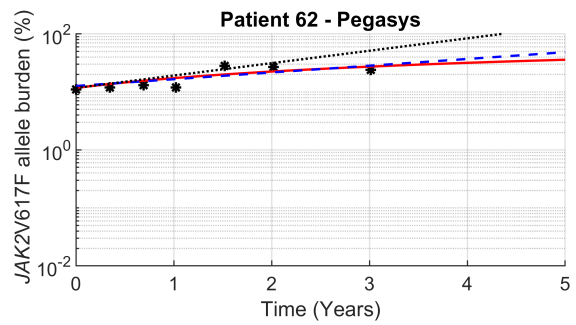

Supplemental figure 67: Data and model fits for patient 62, see legend of Supplemental figure 6

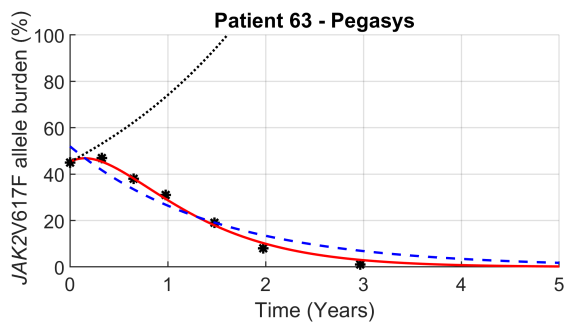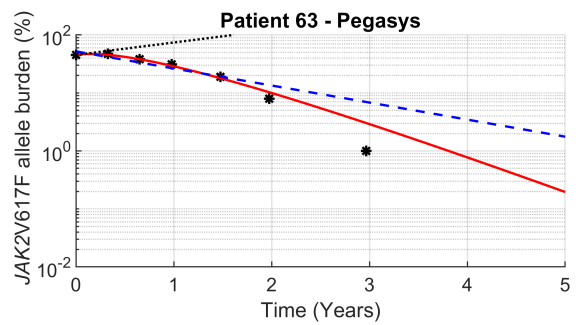

Supplemental figure 68: Data and model fits for patient 63, see legend of Supplemental figure 6

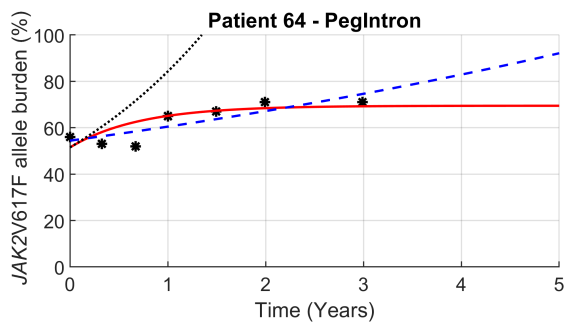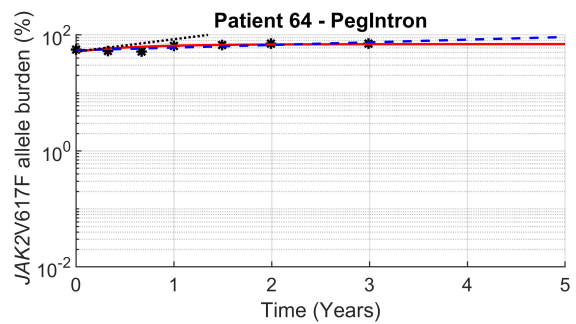

Supplemental figure 69: Data and model fits for patient 64, see legend of Supplemental figure 6

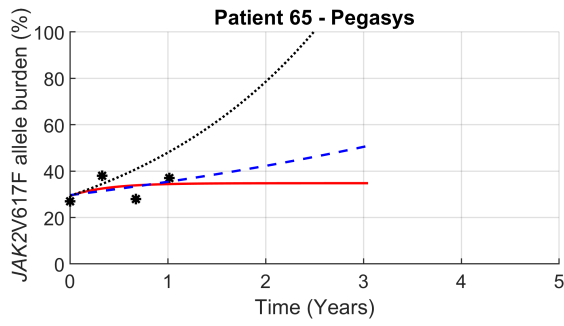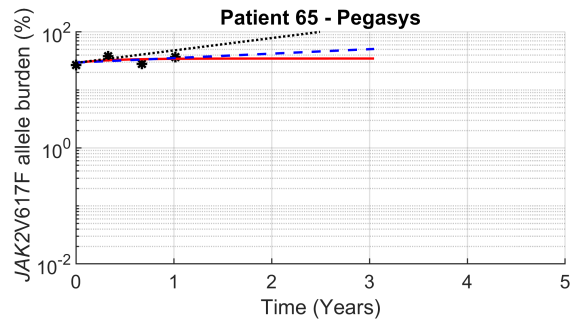

Supplemental figure 70: Data and model fits for patient 65, see legend of Supplemental figure 6

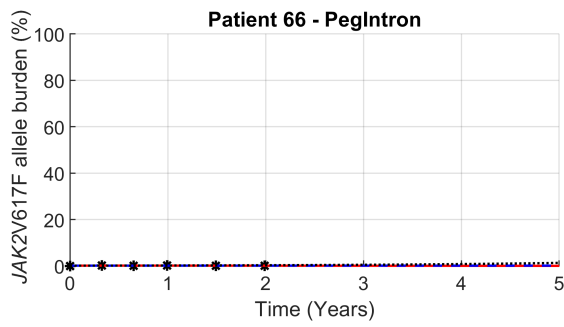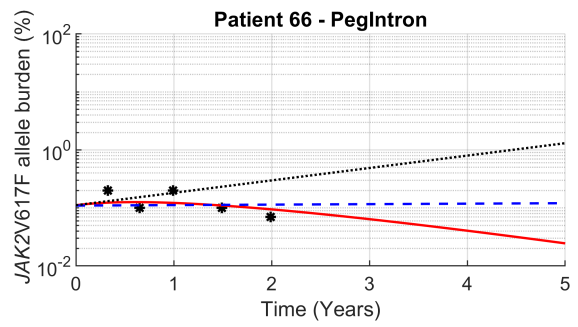

Supplemental figure 71: Data and model fits for patient 66, see legend of Supplemental figure 6

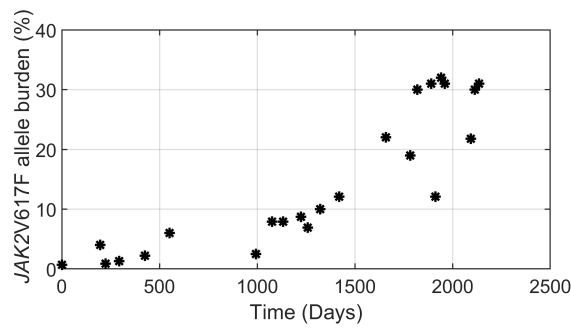

Supplemental figure 72: Raw data for patient A of the retrospective study.

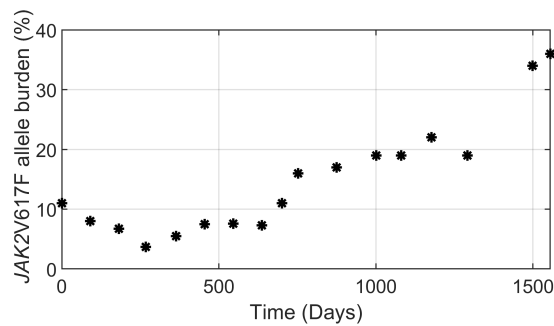

Supplemental figure 73: Raw data for patient B of the retrospective study.

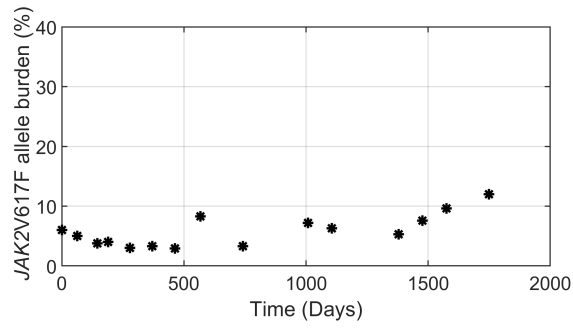

Supplemental figure 74: Raw data for patient C of the retrospective study.

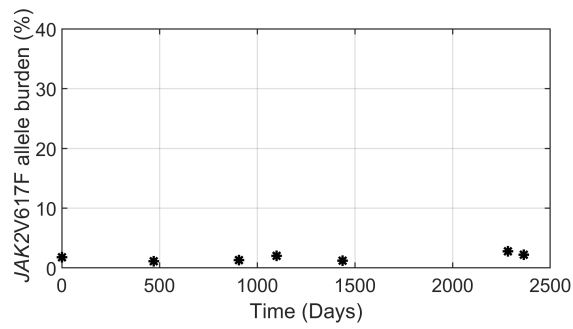

Supplemental figure 75: Raw data for the first of the two patients used as control for comparison only in the retrospective study.

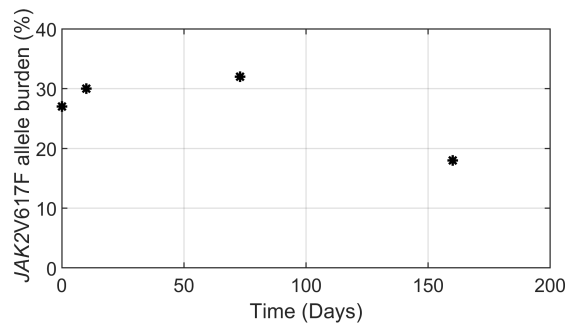

Supplemental figure 76: Raw data for the second of the two patients used as control for comparison only in the retrospective study.
